# Supplementary material for: Gene and MicroRNA Transcriptome Analysis of Parkinson's Related LRRK2 Mouse Models
Source: PLoS One. 2014 Jan 10;9(1):e85510. doi: 10.1371/journal.pone.0085510 (PMC3888428; doi:10.1371/journal.pone.0085510)
Supplement: Table S1 — Total gene changes in LRRK2 mouse models. (XLS) [file pone.0085510.s006.xls]

## Sheet: WT vs KO (4mo)
Table S1 List of significantly affected genes in adult LRRK2 mouse models
Gene_assignment	Gene Symbol	RefSeq	p-value	q value	Ratio (KO vs. WT)	Fold-Change (KO vs. WT)
BC147482 // Gm962 // predicted gene 962 // 19 A|19 // 381201 /// NM_001033448 // Gm962	Gm962	BC147482	6.77676e-06	0.0246913	1.16841	1.16841
NM_001191004 // Lsm6 // LSM6 homolog, U6 small nuclear RNA associated (S. cerevisiae) /	Lsm6	NM_001191004	6.67503e-06	0.0246913	0.716273	-1.39612
NM_010497 // Idh1 // isocitrate dehydrogenase 1 (NADP+), soluble // 1 C2|1 29.8 cM // 1	Idh1	NM_010497	1.0414e-05	0.0246913	0.673551	-1.48467
NM_024499 // Sgta // small glutamine-rich tetratricopeptide repeat (TPR)-containing, al	Sgta	NM_024499	1.07537e-05	0.0246913	0.867632	-1.15256
NM_025730 // Lrrk2 // leucine-rich repeat kinase 2 // 15|15 F1 // 66725 /// ENSMUST0000	Lrrk2	NM_025730	9.91416e-06	0.0246913	0.559524	-1.78723
NM_183389 // Duxbl // double homeobox B-like // 14 A3|14 // 278672 /// NM_001177538 //	Duxbl	NM_183389	6.539e-06	0.0246913	1.41774	1.41774
NM_010480 // Hsp90aa1 // heat shock protein 90, alpha (cytosolic), class A member 1 //	Hsp90aa1	NM_010480	1.3e-05	0.0265323	0.888	-1.12613
ENSMUST00000098108 // B430319F04Rik // RIKEN cDNA B430319F04 gene // 7 F1|7 // 619306	B430319F04Rik	ENSMUST00000098108	1.87789e-05	0.026534	1.26934	1.26934
NM_001191004 // Lsm6 // LSM6 homolog, U6 small nuclear RNA associated (S. cerevisiae) /	Lsm6	NM_001191004	1.64587e-05	0.026534	0.732687	-1.36484
NM_021788 // Sap30 // sin3 associated polypeptide // 8 B2|8 31.0 cM // 60406 /// ENSMUS	Sap30	NM_021788	1.47064e-05	0.026534	0.746665	-1.33929
NM_146032 // Srp68 // signal recognition particle 68 // 11 E2|11 // 217337 /// ENSMUST0	Srp68	NM_146032	1.81218e-05	0.026534	0.851434	-1.17449
ENSMUST00000082411 // ND3 // NADH dehydrogenase subunit 3 // --- // 17718	ND3	ENSMUST00000082411	3.68571e-05	0.0294353	1.18326	1.18326
NM_015754 // Rbbp9 // retinoblastoma binding protein 9 // 2|2 G1-H1 // 26450 /// BC1478	Rbbp9	NM_015754	3.66857e-05	0.0294353	0.90406	-1.10612
NM_017391 // Slc5a3 // solute carrier family 5 (inositol transporters), member 3 // 16	Slc5a3	NM_017391	2.94597e-05	0.0294353	0.685566	-1.45865
NM_019971 // Pdgfc // platelet-derived growth factor, C polypeptide // 3 E3|3 // 54635	Pdgfc	NM_019971	3.33751e-05	0.0294353	0.784028	-1.27546
NM_025449 // Nicn1 // nicolin 1 // 9 F2|9 // 66257 /// ENSMUST00000035227 // Nicn1 // n	Nicn1	NM_025449	3.01715e-05	0.0294353	0.771234	-1.29662
NM_025491 // Susd3 // sushi domain containing 3 // 13|13 B1 // 66329 /// ENSMUST0000005	Susd3	NM_025491	2.41199e-05	0.0294353	1.11866	1.11866
NM_026888 // Phkg2 // phosphorylase kinase, gamma 2 (testis) // 7|7 F4 // 68961 /// NM_	Phkg2	NM_026888	3.32274e-05	0.0294353	0.779002	-1.28369
NM_028802 // Gpcpd1 // glycerophosphocholine phosphodiesterase GDE1 homolog (S. cerevis	Gpcpd1	NM_028802	2.91778e-05	0.0294353	1.17999	1.17999
NM_175127 // Fbxo28 // F-box protein 28 // 1 H5|1 98.7 cM // 67948 /// ENSMUST000000514	Fbxo28	NM_175127	3.43984e-05	0.0294353	0.819988	-1.21953
NM_025372 // Tipin // timeless interacting protein // 9 D|9 36.0 cM // 66131 /// ENSMUS	Tipin	NM_025372	4.02629e-05	0.0306899	1.31752	1.31752
NM_053091 // Cox4i2 // cytochrome c oxidase subunit IV isoform 2 // 2|2 H2 // 84682 ///	Cox4i2	NM_053091	4.17695e-05	0.0306899	1.18332	1.18332
NM_001163487 // Pfkm // phosphofructokinase, muscle // 15 F1|15 // 18642 /// NM_021514	Pfkm	NM_001163487	4.50584e-05	0.0308069	0.836216	-1.19586
NM_024277 // Rps27a // ribosomal protein S27A // 11 A3.3|11 // 78294 /// NM_001033865 /	Rps27a	NM_024277	4.60317e-05	0.0308069	1.15449	1.15449
BC115525 // 9230110C19Rik // RIKEN cDNA 9230110C19 gene // 9 A1|9 // 234912 /// NM_1990	9230110C19Rik	BC115525	5.27647e-05	0.0323071	0.728206	-1.37324
NM_144793 // Slc25a38 // solute carrier family 25, member 38 // 9 F4|9 // 208638 /// EN	Slc25a38	NM_144793	5.16636e-05	0.0323071	0.780596	-1.28107
NM_029607 // 2310003C23Rik // RIKEN cDNA 2310003C23 gene // 2 H4|2 // 76425 /// ENSMUST	2310003C23Rik	NM_029607	5.49697e-05	0.0325714	1.1327	1.1327
NM_007764 // Crkl // v-crk sarcoma virus CT10 oncogene homolog (avian)-like // 16 A3|16	Crkl	NM_007764	6.4102e-05	0.035847	0.854824	-1.16983
NM_145142 // Chst10 // carbohydrate sulfotransferase 10 // 1 B|1 // 98388 /// ENSMUST00	Chst10	NM_145142	6.44008e-05	0.035847	0.842062	-1.18756
NM_016762 // Matn2 // matrilin 2 // 15|15 B3.3 // 17181 /// ENSMUST00000022947 // Matn2	Matn2	NM_016762	7.37882e-05	0.0387253	0.727997	-1.37363
NM_172718 // Sgsm1 // small G protein signaling modulator 1 // 5 F|5 61.0 cM // 52850 /	Sgsm1	NM_172718	7.33488e-05	0.0387253	0.704294	-1.41986
NM_007508 // Atp6v1a // ATPase, H+ transporting, lysosomal V1 subunit A // 16 B4|16 //	Atp6v1a	NM_007508	8.04189e-05	0.0391678	0.809149	-1.23587
NM_009744 // Bcl6 // B-cell leukemia/lymphoma 6 // 16 B1|16 13.9 cM // 12053 /// ENSMUS	Bcl6	NM_009744	8.10283e-05	0.0391678	0.692428	-1.44419
NM_028791 // Ftsjd2 // FtsJ methyltransferase domain containing 2 // 17 A3.3|17 // 7415	Ftsjd2	NM_028791	7.98319e-05	0.0391678	0.768428	-1.30136
NM_013502 // Ctbp1 // C-terminal binding protein 1 // 5 B1|5 19.0 cM // 13016 /// ENSMU	Ctbp1	NM_013502	8.76728e-05	0.0412929	0.896529	-1.11541
NM_008672 // Nap1l4 // nucleosome assembly protein 1-like 4 // 7 F5|7 69.55 cM // 17955	Nap1l4	NM_008672	9.99096e-05	0.0447609	0.870588	-1.14865
NM_023418 // Pgam1 // phosphoglycerate mutase 1 // 19 C3|19 // 18648 /// ENSMUST0000001	Pgam1	NM_023418	9.9059e-05	0.0447609	0.863278	-1.15838
NM_001079695 // Srsf5 // serine/arginine-rich splicing factor 5 // 12|12 D2 // 20384 //	Srsf5	NM_001079695	0.000116119	0.0478604	1.23355	1.23355
NM_001079695 // Srsf5 // serine/arginine-rich splicing factor 5 // 12|12 D2 // 20384 //	Srsf5	NM_001079695	0.000110338	0.0478604	1.25303	1.25303
NM_023119 // Eno1 // enolase 1, alpha non-neuron // 4 E2|4 79.0 cM // 13806 /// BC08333	Eno1	NM_023119	0.000122461	0.0478604	0.87566	-1.142
NM_153520 // Opalin // oligodendrocytic myelin paranodal and inner loop protein // 19 C	Opalin	NM_153520	0.000120375	0.0478604	1.94694	1.94694
NM_172596 // Sec24c // Sec24 related gene family, member C (S. cerevisiae) // 14 A3|14	Sec24c	NM_172596	0.000115467	0.0478604	0.855277	-1.16921
NM_183027 // Ap1s3 // adaptor-related protein complex AP-1, sigma 3 // 1 C4|1 // 252903	Ap1s3	NM_183027	0.000118187	0.0478604	0.784531	-1.27465
NM_007895 // Ear2 // eosinophil-associated, ribonuclease A family, member 2 // 14 C1|14	Ear2	NM_007895	0.000129157	0.0486942	1.1541	1.1541
NM_009256 // Serpinb9 // serine (or cysteine) peptidase inhibitor, clade B, member 9 //	Serpinb9	NM_009256	0.000129897	0.0486942	0.71197	-1.40455
NM_025692 // Uba5 // ubiquitin-like modifier activating enzyme 5 // 9 F1|9 // 66663 ///	Uba5	NM_025692	0.000136823	0.0502648	0.882069	-1.1337
ENSMUST00000099425 // Gm10775 // predicted gene 10775 // 13 B3|13 // 100038683	Gm10775	ENSMUST00000099425	0.000167801	0.0540748	1.14836	1.14836
NM_001025246 // Trp53i11 // transformation related protein 53 inducible protein 11 // 2	Trp53i11	NM_001025246	0.000154947	0.0540748	0.641533	-1.55877
NM_001033535 // Tnfaip8l3 // tumor necrosis factor, alpha-induced protein 8-like 3 // 9	Tnfaip8l3	NM_001033535	0.000164555	0.0540748	0.668167	-1.49663
NM_009609 // Actg1 // actin, gamma, cytoplasmic 1 // 11 E2|11 // 11465 /// ENSMUST00000	Actg1	NM_009609	0.000164731	0.0540748	1.09594	1.09594
NM_018879 // Nprl2 // nitrogen permease regulator-like 2 (S. cerevisiae) // 9 F1|9 // 5	Nprl2	NM_018879	0.00016757	0.0540748	0.835533	-1.19684
NM_023119 // Eno1 // enolase 1, alpha non-neuron // 4 E2|4 79.0 cM // 13806 /// BC08333	Eno1	NM_023119	0.00015249	0.0540748	0.846876	-1.18081
NM_177028 // 5330437I02Rik // RIKEN cDNA 5330437I02 gene // 18 E1|18 // 319888 /// ENSM	5330437I02Rik	NM_177028	0.000159583	0.0540748	1.52931	1.52931
NM_001163470 // Trafd1 // TRAF type zinc finger domain containing 1 // 5 F|5 // 231712	Trafd1	NM_001163470	0.000185235	0.0567085	0.876108	-1.14141
NM_009090 // Polr2c // polymerase (RNA) II (DNA directed) polypeptide C // 8 D1|8 // 20	Polr2c	NM_009090	0.000183001	0.0567085	0.897982	-1.11361
NM_019442 // Stk19 // serine/threonine kinase 19 // 17 B1|17 // 54402 /// ENSMUST000000	Stk19	NM_019442	0.000181995	0.0567085	1.16731	1.16731
NM_001168277 // Jazf1 // JAZF zinc finger 1 // 6 B3|6 25.9 cM // 231986 /// NM_173406 /	Jazf1	NM_001168277	0.000198272	0.0587415	0.825362	-1.21159
NM_019833 // Fam69b // family with sequence similarity 69, member B // 2 A3|2 // 56279	Fam69b	NM_019833	0.000195662	0.0587415	0.803459	-1.24462
NM_001077696 // Hdac5 // histone deacetylase 5 // 11 D|11 // 15184 /// NM_010412 // Hda	Hdac5	NM_001077696	0.000208238	0.0594452	0.844508	-1.18412
NM_028221 // Fam192a // family with sequence similarity 192, member A // 8 C5|8 // 1021	Fam192a	NM_028221	0.000211112	0.0594452	0.809735	-1.23497
NM_133215 // Mtmr4 // myotubularin related protein 4 // 11 C|11 // 170749 /// ENSMUST00	Mtmr4	NM_133215	0.000213592	0.0594452	0.832342	-1.20143
NM_134020 // Tmed4 // transmembrane emp24 protein transport domain containing 4 // 11 A	Tmed4	NM_134020	0.000205386	0.0594452	0.852557	-1.17294
NM_001081298 // Lphn2 // latrophilin 2 // 3 H3|3 // 99633 /// ENSMUST00000106127 // Lph	Lphn2	NM_001081298	0.000236455	0.062947	1.22105	1.22105
NM_138312 // Fam172a // family with sequence similarity 172, member A // 13 C1|13 // 68	Fam172a	NM_138312	0.000232095	0.062947	1.11835	1.11835
NM_175145 // Tmem127 // transmembrane protein 127 // 2 F1|2 62.4 cM // 69470 /// ENSMUS	Tmem127	NM_175145	0.00023424	0.062947	0.872948	-1.14554
NM_010422 // Hexb // hexosaminidase B // 13 D1|13 46.0 cM // 15212 /// ENSMUST000000221	Hexb	NM_010422	0.000240177	0.0630243	1.17144	1.17144
ENSMUST00000089252 // I730030J21Rik // RIKEN cDNA I730030J21 gene // --- // 619313	I730030J21Rik	ENSMUST00000089252	0.000252249	0.0640401	1.44767	1.44767
NM_009648 // Akap1 // A kinase (PRKA) anchor protein 1 // 11 C|11 // 11640 /// NM_00104	Akap1	NM_009648	0.000254549	0.0640401	1.22508	1.22508
NM_011239 // Ranbp1 // RAN binding protein 1 // 16 A3|16 10.9 cM // 19385 /// ENSMUST00	Ranbp1	NM_011239	0.000258409	0.0640401	0.850002	-1.17647
NM_011831 // Insl5 // insulin-like 5 // 4 C5-C7|4 49.5 cM // 23919 /// ENSMUST000000843	Insl5	NM_011831	0.00026148	0.0640401	0.831273	-1.20297
NM_019712 // Rbx1 // ring-box 1 // 15 E1|15 // 56438 /// BC027396 // Rbx1 // ring-box 1	Rbx1	NM_019712	0.000250132	0.0640401	0.845908	-1.18216
NM_025635 // Zwint // ZW10 interactor // 10 B5.3|10 38.0 cM // 52696 /// ENSMUST0000010	Zwint	NM_025635	0.000265765	0.0642333	0.826006	-1.21065
NM_016966 // Phgdh // 3-phosphoglycerate dehydrogenase // 3|3 E1 // 236539 /// NM_01696	Phgdh	NM_016966	0.000281361	0.0661012	1.25766	1.25766
NM_025842 // Vps28 // vacuolar protein sorting 28 (yeast) // 15 D3|15 // 66914 /// ENSM	Vps28	NM_025842	0.000277833	0.0661012	0.881608	-1.13429
NR_027879 // 4930583K01Rik // RIKEN cDNA 4930583K01 gene // 7 F1|7 // 67745	4930583K01Rik	NR_027879	0.00028429	0.0661012	1.18673	1.18673
NM_025701 // Trappc5 // trafficking protein particle complex 5 // 8 A1|8 0.39 cM // 666	Trappc5	NM_025701	0.000293531	0.0671324	0.866044	-1.15468
X63004 // Prpmp5 // proline-rich protein MP5 // 6 G1|6 // 381832 /// X63004 // Prpmp5 /	Prpmp5	X63004	0.000296034	0.0671324	1.19781	1.19781
NM_008634 // Mtap1b // microtubule-associated protein 1B // 13 D1|13 51.0 cM // 17755 /	Mtap1b	NM_008634	0.000320433	0.0709143	0.870868	-1.14828
NM_028766 // Tmem43 // transmembrane protein 43 // 6|6 D2 // 74122 /// ENSMUST000000321	Tmem43	NM_028766	0.000320193	0.0709143	0.765496	-1.30634
NM_011962 // Plod3 // procollagen-lysine, 2-oxoglutarate 5-dioxygenase 3 // 5 G2|5 80.0	Plod3	NM_011962	0.000327048	0.0715168	0.827314	-1.20873
AK141913 // 5930403L14Rik // RIKEN cDNA 5930403L14 gene // 4 E2|4 // 320939 /// XR_1049	5930403L14Rik	AK141913	0.000373822	0.0738341	1.1106	1.1106
NM_001033186 // Skap1 // src family associated phosphoprotein 1 // 11 D|11 // 78473 ///	Skap1	NM_001033186	0.00036724	0.0738341	1.1129	1.1129
NM_001110100 // Banp // BTG3 associated nuclear protein // 8 E1|8 66.0 cM // 53325 ///	Banp	NM_001110100	0.000358164	0.0738341	0.670595	-1.49121
NM_008740 // Nsf // N-ethylmaleimide sensitive fusion protein // 11 E1|11 63.0 cM // 18	Nsf	NM_008740	0.00036307	0.0738341	0.882126	-1.13363
NM_013609 // Ngf // nerve growth factor // 3 F2.2|3 48.5 cM // 18049 /// NM_001112698 /	Ngf	NM_013609	0.000343504	0.0738341	0.75389	-1.32645
NM_025862 // Acad8 // acyl-Coenzyme A dehydrogenase family, member 8 // 9 A4|9 // 66948	Acad8	NM_025862	0.000347097	0.0738341	0.830221	-1.2045
NM_133991 // Ftsj1 // FtsJ homolog 1 (E. coli) // X A1.1|X 2.0 cM // 54632 /// BC034880	Ftsj1	NM_133991	0.00037327	0.0738341	0.853466	-1.17169
NM_173751 // Ilvbl // ilvB (bacterial acetolactate synthase)-like // 10 C1|10 42.3 cM /	Ilvbl	NM_173751	0.000373753	0.0738341	1.16314	1.16314
XM_908296 // LOC546711 // 40S ribosomal protein S25-like // 18 B2|18 // 546711	LOC546711	XM_908296	0.000364967	0.0738341	1.13158	1.13158
NM_008533 // Cd180 // CD180 antigen // 13 D1|13 // 17079 /// ENSMUST00000022124 // Cd18	Cd180	NM_008533	0.000386293	0.0754857	1.54603	1.54603
NM_133348 // Acot7 // acyl-CoA thioesterase 7 // 4 E2|4 // 70025 /// NM_001146057 // Ac	Acot7	NM_133348	0.000394459	0.07627	0.83074	-1.20375
NM_025595 // Mrpl51 // mitochondrial ribosomal protein L51 // 6|6 F2 // 66493 /// ENSMU	Mrpl51	NM_025595	0.000398827	0.0763113	0.814369	-1.22794
NM_013896 // Timm9 // translocase of inner mitochondrial membrane 9 homolog (yeast) //	Timm9	NM_013896	0.000413655	0.0767501	1.1196	1.1196
NM_172513 // Fam126b // family with sequence similarity 126, member B // 1 C1.3|1 30.1	Fam126b	NM_172513	0.000410248	0.0767501	0.873744	-1.1445
NM_009786 // Cacybp // calcyclin binding protein // 1|1 H1 // 12301 /// ENSMUST00000014	Cacybp	NM_009786	0.000429143	0.0785014	0.874456	-1.14357
NR_029754 // Mir103-1 // microRNA 103-1 // 11|11 // 723824	Mir103-1	NR_029754	0.000431642	0.0785014	1.25937	1.25937
NM_080456 // Mrps6 // mitochondrial ribosomal protein S6 // 16 C4|16 // 121022 /// NM_0	Mrps6	NM_080456	0.000442319	0.0789107	0.794446	-1.25874
NM_133741 // Snrk // SNF related kinase // 9 F4|9 // 20623 /// NM_001164572 // Snrk //	Snrk	NM_133741	0.000442484	0.0789107	0.812586	-1.23064
NM_152923 // Kcnq3 // potassium voltage-gated channel, subfamily Q, member 3 // 15 D1-D	Kcnq3	NM_152923	0.00044929	0.0793541	1.20359	1.20359
NM_026932 // Ebna1bp2 // EBNA1 binding protein 2 // 4 D2.1|4 // 69072 /// NR_029469 //	Ebna1bp2	NM_026932	0.000470097	0.0822381	0.728647	-1.37241
NM_001081417 // Chd7 // chromodomain helicase DNA binding protein 7 // 4 A1|4 1.0 cM //	Chd7	NM_001081417	0.000490196	0.0833723	1.22817	1.22817
NM_009023 // Rapsn // receptor-associated protein of the synapse // 2 E1|2 47.5 cM // 1	Rapsn	NM_009023	0.000485855	0.0833723	1.14859	1.14859
NM_011181 // Cyth2 // cytohesin 2 // 7 B4|7 // 19158 /// NM_001112701 // Cyth2 // cytoh	Cyth2	NM_011181	0.000483771	0.0833723	0.818903	-1.22115
NM_016957 // Hmgn2 // high mobility group nucleosomal binding domain 2 // 4 D3|4 62.2 c	Hmgn2	NM_016957	0.000511905	0.0849672	1.19229	1.19229
NM_207652 // Tsc22d1 // TSC22 domain family, member 1 // 14 D3|14 42.0 cM // 21807 ///	Tsc22d1	NM_207652	0.000512528	0.0849672	0.909067	-1.10003
NM_024207 // Derl1 // Der1-like domain family, member 1 // 15|15 D2 // 67819 /// ENSMUS	Derl1	NM_024207	0.000531779	0.085708	0.900883	-1.11002
NM_145404 // Prmt7 // protein arginine N-methyltransferase 7 // 8 D3|8 // 214572 /// EN	Prmt7	NM_145404	0.000531926	0.085708	0.821602	-1.21713
NM_198660 // E230008N13Rik // RIKEN cDNA E230008N13 gene // 4 B1|4 // 381522 /// ENSMUS	E230008N13Rik	NM_198660	0.000526092	0.085708	1.15782	1.15782
AK006938 // 1700072H12Rik // RIKEN cDNA 1700072H12 gene // 11|11 // 73493	1700072H12Rik	AK006938	0.00057687	0.0857716	1.44121	1.44121
NM_001024920 // Trp53i13 // transformation related protein 53 inducible protein 13 // 1	Trp53i13	NM_001024920	0.000555415	0.0857716	1.09767	1.09767
NM_001198565 // Sulf1 // sulfatase 1 // 1 A3|1 // 240725 /// NM_172294 // Sulf1 // sulf	Sulf1	NM_001198565	0.000563429	0.0857716	0.613465	-1.63008
NM_009307 // Syt2 // synaptotagmin II // 1 E4|1 73.5 cM // 20980 /// ENSMUST00000027721	Syt2	NM_009307	0.000578431	0.0857716	1.29619	1.29619
NM_009315 // Taf6 // TAF6 RNA polymerase II, TATA box binding protein (TBP)-associated	Taf6	NM_009315	0.000568492	0.0857716	0.910521	-1.09827
NM_011198 // Ptgs2 // prostaglandin-endoperoxide synthase 2 // 1 H1|1 76.2 cM // 19225	Ptgs2	NM_011198	0.000564619	0.0857716	0.484422	-2.06431
NM_011796 // Capn10 // calpain 10 // 1 D|1 // 23830 /// ENSMUST00000027488 // Capn10 //	Capn10	NM_011796	0.000587463	0.0857716	0.832001	-1.20192
NM_025895 // Med28 // mediator of RNA polymerase II transcription, subunit 28 homolog (	Med28	NM_025895	0.000588354	0.0857716	0.709447	-1.40955
NM_028888 // 4931428F04Rik // RIKEN cDNA 4931428F04 gene // 8 D3|8 // 74356 /// NM_0011	4931428F04Rik	NM_028888	0.000571911	0.0857716	0.732839	-1.36456
NM_146530 // Olfr1186 // olfactory receptor 1186 // 2 D|2 // 258523 /// ENSMUST00000075	Olfr1186	NM_146530	0.000580595	0.0857716	0.851173	-1.17485
NM_176829 // 4931440F15Rik // RIKEN cDNA 4931440F15 gene // 11 A3.3|11 // 216622 /// EN	4931440F15Rik	NM_176829	0.000577791	0.0857716	1.34084	1.34084
NR_001584 // Speer8-ps1 // spermatogenesis associated glutamate (E)-rich protein 8, pse	Speer8-ps1	NR_001584	0.000548208	0.0857716	1.2538	1.2538
NM_008252 // Hmgb2 // high mobility group box 2 // 8 B2|8 31.0 cM // 97165 /// ENSMUST0	Hmgb2	NM_008252	0.000619355	0.0870979	1.17011	1.17011
NM_009133 // Stmn3 // stathmin-like 3 // 2 H4|2 // 20262 /// ENSMUST00000103045 // Stmn	Stmn3	NM_009133	0.0006112	0.0870979	0.832357	-1.20141
NM_011186 // Psmb5 // proteasome (prosome, macropain) subunit, beta type 5 // 14 C2-D1|	Psmb5	NM_011186	0.000618404	0.0870979	0.859823	-1.16303
NM_025676 // Mcm8 // minichromosome maintenance deficient 8 (S. cerevisiae) // 2|2 F3 /	Mcm8	NM_025676	0.000607258	0.0870979	1.15171	1.15171
NM_175381 // 2700081O15Rik // RIKEN cDNA 2700081O15 gene // 19 A|19 // 108899 /// ENSMU	2700081O15Rik	NM_175381	0.00062116	0.0870979	0.76905	-1.30031
NM_001004174 // AA467197 // expressed sequence AA467197 // 2 E5|2 // 433470 /// NR_0305	AA467197	NM_001004174	0.000637672	0.0878101	1.13181	1.13181
NM_001029878 // Lonrf2 // LON peptidase N-terminal domain and ring finger 2 // 1 B|1 //	Lonrf2	NM_001029878	0.000645618	0.0878101	0.815535	-1.22619
NM_001031664 // Nudt10 // nudix (nucleoside diphosphate linked moiety X)-type motif 10	Nudt10	NM_001031664	0.000633595	0.0878101	0.840496	-1.18977
NM_015733 // Casp9 // caspase 9 // 4 E1|4 // 12371 /// ENSMUST00000030747 // Casp9 // c	Casp9	NM_015733	0.000649142	0.0878101	1.10397	1.10397
NM_133185 // Rogdi // rogdi homolog (Drosophila) // 16 A1|16 3.3 cM // 66049 /// BC0069	Rogdi	NM_133185	0.000650142	0.0878101	0.88389	-1.13136
NM_007920 // Elf1 // E74-like factor 1 // 14 D3|14 // 13709 /// ENSMUST00000040131 // E	Elf1	NM_007920	0.000663216	0.0884335	1.19249	1.19249
NM_133816 // Sh3bp4 // SH3-domain binding protein 4 // 1 D|1 // 98402 /// ENSMUST000000	Sh3bp4	NM_133816	0.000664386	0.0884335	0.860663	-1.16189
NM_011373 // St6galnac4 // ST6 (alpha-N-acetyl-neuraminyl-2,3-beta-galactosyl-1,3)-N-ac	St6galnac4	NM_011373	0.000672002	0.0888037	0.840961	-1.18912
BC031781 // BC031781 // cDNA sequence BC031781 // 1 H4|1 // 208768 /// ENSMUST000000380	BC031781	BC031781	0.000694501	0.0889214	0.775508	-1.28948
NM_001036293 // Nrbf2 // nuclear receptor binding factor 2 // 10 B5.1|10 // 641340 ///	Nrbf2	NM_001036293	0.000690176	0.0889214	0.897822	-1.11381
NM_026499 // Srsf6 // serine/arginine-rich splicing factor 6 // 2 H2|2 79.8 cM // 67996	Srsf6	NM_026499	0.000698657	0.0889214	0.881632	-1.13426
NM_176968 // Nt5dc1 // 5'-nucleotidase domain containing 1 // 10 B1|10 // 319638 /// EN	Nt5dc1	NM_176968	0.000688104	0.0889214	1.2293	1.2293
NM_178683 // Depdc1b // DEP domain containing 1B // 13 D2.1|13 // 218581 /// ENSMUST000	Depdc1b	NM_178683	0.000701938	0.0889214	1.12006	1.12006
NM_178686 // Cep120 // centrosomal protein 120 // 18 D1|18 // 225523 /// ENSMUST0000004	Cep120	NM_178686	0.000692176	0.0889214	0.882152	-1.13359
NM_009672 // Anp32a // acidic (leucine-rich) nuclear phosphoprotein 32 family, member A	Anp32a	NM_009672	0.000720133	0.0906014	0.755764	-1.32316
ENSMUST00000095785 // 2410022M11Rik // RIKEN cDNA 2410022M11 gene // 14|14 // 69755	2410022M11Rik	ENSMUST00000095785	0.000727644	0.0906494	1.19668	1.19668
NM_001039089 // Sel1l // sel-1 suppressor of lin-12-like (C. elegans) // 12|12 E // 203	Sel1l	NM_001039089	0.000766473	0.0906494	0.890373	-1.12312
NM_001162532 // Fam174b // family with sequence similarity 174, member B // 7|7 // 1000	Fam174b	NM_001162532	0.000733302	0.0906494	0.775747	-1.28908
NM_001164679 // Ano8 // anoctamin 8 // 8 B3.3|8 // 382014 /// NM_025600 // Dda1 // DET1	Ano8	NM_001164679	0.000747723	0.0906494	1.15267	1.15267
NM_001191004 // Lsm6 // LSM6 homolog, U6 small nuclear RNA associated (S. cerevisiae) /	Lsm6	NM_001191004	0.00075464	0.0906494	0.771437	-1.29628
NM_016714 // Nup50 // nucleoporin 50 // 15 E2|15 49.3 cM // 18141 /// ENSMUST0000001676	Nup50	NM_016714	0.000768723	0.0906494	0.833463	-1.19981
NM_053214 // Myo1f // myosin IF // 17 B-C|17 17.5 cM // 17916 /// ENSMUST00000087605 //	Myo1f	NM_053214	0.000769864	0.0906494	1.16935	1.16935
NM_144521 // Snap47 // synaptosomal-associated protein, 47 // 11 B1.3|11 // 67826 /// E	Snap47	NM_144521	0.00074724	0.0906494	0.831552	-1.20257
NM_153059 // Tmem5 // transmembrane protein 5 // 10 D2|10 // 216395 /// NR_004052 // Gm	Tmem5	NM_153059	0.000761418	0.0906494	1.14496	1.14496
NM_153405 // Rbm45 // RNA binding motif protein 45 // 2 C3|2 // 241490 /// AY152391 //	Rbm45	NM_153405	0.000753976	0.0906494	0.825921	-1.21077
NM_009188 // Sin3b // transcriptional regulator, SIN3B (yeast) // 8 C2|8 33.0 cM // 204	Sin3b	NM_009188	0.000779278	0.0911734	0.857695	-1.16592
NM_001033140 // Sdhaf1 // succinate dehydrogenase complex assembly factor 1 // 7 B1|7 /	Sdhaf1	NM_001033140	0.000811341	0.0931236	1.19099	1.19099
NM_001083110 // Pja1 // praja1, RING-H2 motif containing // X C3|X 36.6 cM // 18744 ///	Pja1	NM_001083110	0.00082429	0.0931236	0.83116	-1.20314
NM_008799 // Pdcd2 // programmed cell death 2 // 17 A2|17 8.26 cM // 18567 /// ENSMUST0	Pdcd2	NM_008799	0.000815586	0.0931236	0.885366	-1.12948
NM_019811 // Acss2 // acyl-CoA synthetase short-chain family member 2 // 2|2 H2 // 6052	Acss2	NM_019811	0.000818863	0.0931236	0.74666	-1.3393
NM_172728 // Creb5 // cAMP responsive element binding protein 5 // 6 B3|6 25.8 cM // 23	Creb5	NM_172728	0.000826365	0.0931236	1.28093	1.28093
NM_001134461 // Prickle2 // prickle homolog 2 (Drosophila) // 6 D1|6 // 243548 /// NM_0	Prickle2	NM_001134461	0.000845575	0.093667	0.841168	-1.18882
NM_009685 // Apbb1 // amyloid beta (A4) precursor protein-binding, family B, member 1 /	Apbb1	NM_009685	0.00083717	0.093667	0.755924	-1.32288
NM_028769 // Syvn1 // synovial apoptosis inhibitor 1, synoviolin // 19 A|19 // 74126 //	Syvn1	NM_028769	0.000846485	0.093667	0.82204	-1.21649
NM_001010840 // Taar8c // trace amine-associated receptor 8C // 10 A4|10 // 494546 ///	Taar8c	NM_001010840	0.000875086	0.0953087	0.828745	-1.20664
NM_013935 // Ptpla // protein tyrosine phosphatase-like (proline instead of catalytic a	Ptpla	NM_013935	0.000868356	0.0953087	1.20842	1.20842
NM_172605 // Tdrd3 // tudor domain containing 3 // 14 E1|14 // 219249 /// BC005670 // T	Tdrd3	NM_172605	0.000876887	0.0953087	1.12735	1.12735
ENSMUST00000082411 // ND3 // NADH dehydrogenase subunit 3 // --- // 17718 /// ENSMUST00	ND3	ENSMUST00000082411	0.000931887	0.0984233	1.21167	1.21167
NM_007414 // Adprh // ADP-ribosylarginine hydrolase // 16|16 B4 // 11544 /// ENSMUST000	Adprh	NM_007414	0.00100165	0.0984233	0.82732	-1.20872
NM_007636 // Cct2 // chaperonin containing Tcp1, subunit 2 (beta) // 10 D2|10 // 12461	Cct2	NM_007636	0.00100493	0.0984233	0.85448	-1.1703
NM_008703 // Nmbr // neuromedin B receptor // 10 A2|10 // 18101 /// ENSMUST00000020015	Nmbr	NM_008703	0.000944983	0.0984233	0.342249	-2.92185
NM_010828 // Cited2 // Cbp/p300-interacting transactivator, with Glu/Asp-rich carboxy-t	Cited2	NM_010828	0.000967712	0.0984233	0.835498	-1.19689
NM_016789 // Nptx2 // neuronal pentraxin 2 // 5 G2|5 82.0 cM // 53324 /// ENSMUST000000	Nptx2	NM_016789	0.00096091	0.0984233	0.595288	-1.67986
NM_018818 // Chm // choroidermia // X E1|X // 12662 /// ENSMUST00000026607 // Chm // ch	Chm	NM_018818	0.000925462	0.0984233	1.15539	1.15539
NM_020603 // Wdr46 // WD repeat domain 46 // 17 B1|17 // 57315 /// ENSMUST00000025170 /	Wdr46	NM_020603	0.000974003	0.0984233	0.87363	-1.14465
NM_025292 // Synj2bp // synaptojanin 2 binding protein // 12 D2|12 38.0 cM // 24071 ///	Synj2bp	NM_025292	0.000988816	0.0984233	0.883328	-1.13208
NM_025828 // Lman2 // lectin, mannose-binding 2 // 13 B1|13 // 66890 /// ENSMUST0000002	Lman2	NM_025828	0.000993449	0.0984233	0.820138	-1.21931
NM_026050 // 2810453I06Rik // RIKEN cDNA 2810453I06 gene // 5 G2|5 // 67238 /// NM_1337	2810453I06Rik	NM_026050	0.000925084	0.0984233	0.870006	-1.14942
NM_026675 // Nudt22 // nudix (nucleoside diphosphate linked moiety X)-type motif 22 //	Nudt22	NM_026675	0.000990276	0.0984233	0.74539	-1.34158
NM_053166 // Trim7 // tripartite motif-containing 7 // 11 B1.2|11 // 94089 /// ENSMUST0	Trim7	NM_053166	0.000978684	0.0984233	1.08931	1.08931
NM_053198 // Sfxn4 // sideroflexin 4 // 19 D3|19 // 94281 /// ENSMUST00000135808 // Sfx	Sfxn4	NM_053198	0.000933204	0.0984233	1.20843	1.20843
NM_145584 // Spon1 // spondin 1, (f-spondin) extracellular matrix protein // 7 F1|7 //	Spon1	NM_145584	0.000999718	0.0984233	0.729461	-1.37087
NM_153387 // Tubgcp4 // tubulin, gamma complex associated protein 4 // 2 F1|2 69.0 cM /	Tubgcp4	NM_153387	0.0010122	0.0984233	0.854195	-1.17069
NM_153546 // Mboat1 // membrane bound O-acyltransferase domain containing 1 // 13 A3.2|	Mboat1	NM_153546	0.00101271	0.0984233	1.31331	1.31331
NM_174874 // Atg4b // autophagy-related 4B (yeast) // 1 D|1 // 66615 /// ENSMUST0000002	Atg4b	NM_174874	0.000932186	0.0984233	0.793911	-1.25959
NR_036630 // Gm1082 // predicted gene 1082 // 7 B1|7 // 381868 /// BC065044 // Gm1082 /	Gm1082	NR_036630	0.00094681	0.0984233	1.1511	1.1511
BC052328 // Fam105a // family with sequence similarity 105, member A // 15 B1|15 // 223	Fam105a	BC052328	0.0010791	0.0988321	1.30514	1.30514
ENSMUST00000084967 // Gm10158 // predicted gene 10158 // --- // 791310	Gm10158	ENSMUST00000084967	0.00104999	0.0988321	1.18892	1.18892
NM_001036293 // Nrbf2 // nuclear receptor binding factor 2 // 10 B5.1|10 // 641340 ///	Nrbf2	NM_001036293	0.00107839	0.0988321	0.88704	-1.12734
NM_001036293 // Nrbf2 // nuclear receptor binding factor 2 // 10 B5.1|10 // 641340 ///	Nrbf2	NM_001036293	0.00107839	0.0988321	0.88704	-1.12734
NM_001081112 // Ankrd26 // ankyrin repeat domain 26 // 6 F1|6 // 232339 /// ENSMUST0000	Ankrd26	NM_001081112	0.00103059	0.0988321	0.87109	-1.14799
NM_008704 // Nme1 // non-metastatic cells 1, protein (NM23A) expressed in // 11 D|11 //	Nme1	NM_008704	0.0010691	0.0988321	0.817957	-1.22256
NM_022017 // Trpv4 // transient receptor potential cation channel, subfamily V, member	Trpv4	NM_022017	0.00107195	0.0988321	1.08676	1.08676
NM_027594 // Ttll7 // tubulin tyrosine ligase-like family, member 7 // 3 H2|3 // 70892	Ttll7	NM_027594	0.00105434	0.0988321	1.08627	1.08627
NM_028724 // Rin2 // Ras and Rab interactor 2 // 2 G1|2 // 74030 /// ENSMUST00000110005	Rin2	NM_028724	0.00107145	0.0988321	0.857638	-1.16599
NM_145123 // Crtac1 // cartilage acidic protein 1 // 19 C3|19 // 72832 /// NM_001141983	Crtac1	NM_145123	0.00105899	0.0988321	0.644073	-1.55262
NM_207229 // Plac9 // placenta specific 9 // 14|14 B // 211623 /// BC032982 // Plac9 //	Plac9	NM_207229	0.00108148	0.0988321	1.28923	1.28923
NM_207229 // Plac9 // placenta specific 9 // 14|14 B // 211623 /// BC032982 // Plac9 //	Plac9	NM_207229	0.00108148	0.0988321	1.28923	1.28923
NM_023154 // Ethe1 // ethylmalonic encephalopathy 1 // 7 A3|7 // 66071 /// ENSMUST00000	Ethe1	NM_023154	0.00109437	0.0995149	0.84767	-1.1797
NM_025359 // Tspan13 // tetraspanin 13 // 12|12 B2 // 66109 /// ENSMUST00000020896 // T	Tspan13	NM_025359	0.00111037	0.100042	0.901992	-1.10866
NM_177320 // Pik3r5 // phosphoinositide-3-kinase, regulatory subunit 5, p101 // 11 B3|1	Pik3r5	NM_177320	0.00112471	0.100288	1.12448	1.12448
NM_001037761 // Capzb // capping protein (actin filament) muscle Z-line, beta // 4 D3|4	Capzb	NM_001037761	0.00115932	0.101615	0.903688	-1.10658
NM_001168535 // Cdadc1 // cytidine and dCMP deaminase domain containing 1 // 14 D1|14 /	Cdadc1	NM_001168535	0.0011896	0.101615	0.892008	-1.12107
NM_001190483 // Pcsk5 // proprotein convertase subtilisin/kexin type 5 // 19 B|19 18.0	Pcsk5	NM_001190483	0.00118586	0.101615	0.783609	-1.27615
NM_016844 // Rps28 // ribosomal protein S28 // 17 B1|17 // 54127 /// BC090982 // Rps28	Rps28	NM_016844	0.00118912	0.101615	1.18948	1.18948
NM_020000 // Med8 // mediator of RNA polymerase II transcription, subunit 8 homolog (ye	Med8	NM_020000	0.00118404	0.101615	0.87159	-1.14733
NM_028727 // Nol9 // nucleolar protein 9 // 4 E2|4 // 74035 /// NM_001159599 // Nol9 //	Nol9	NM_028727	0.00120045	0.101615	0.896448	-1.11551
NM_134024 // Tubg1 // tubulin, gamma 1 // 11 D|11 60.0 cM // 103733 /// ENSMUST00000043	Tubg1	NM_134024	0.00117033	0.101615	0.855839	-1.16844
NM_172416 // Ostm1 // osteopetrosis associated transmembrane protein 1 // 10 B2|10 29.0	Ostm1	NM_172416	0.00118299	0.101615	0.881457	-1.13449
NM_172659 // Slc2a6 // solute carrier family 2 (facilitated glucose transporter), membe	Slc2a6	NM_172659	0.00115024	0.101615	0.756341	-1.32215
NM_176840 // Osbpl11 // oxysterol binding protein-like 11 // 16 B3|16 // 106326 /// ENS	Osbpl11	NM_176840	0.0011967	0.101615	0.867129	-1.15323
NM_207229 // Plac9 // placenta specific 9 // 14|14 B // 211623 /// BC032982 // Plac9 //	Plac9	NM_207229	0.00116457	0.101615	1.28102	1.28102
NM_007396 // Acvr2a // activin receptor IIA // 2 C1.1|2 30.0 cM // 11480 /// ENSMUST000	Acvr2a	NM_007396	0.00123909	0.103928	0.766499	-1.30463
NM_177680 // Ythdc1 // YTH domain containing 1 // 5 E1|5 // 231386 /// ENSMUST000000383	Ythdc1	NM_177680	0.00123837	0.103928	0.868351	-1.15161
NM_183297 // Nxph4 // neurexophilin 4 // 10 D3|10 // 104080 /// ENSMUST00000095266 // N	Nxph4	NM_183297	0.00125814	0.105047	0.666324	-1.50077
NM_010301 // Gna11 // guanine nucleotide binding protein, alpha 11 // 10 C1|10 43.0 cM	Gna11	NM_010301	0.0012683	0.105415	0.869761	-1.14974
NM_001080943 // Zdhhc22 // zinc finger, DHHC-type containing 22 // 12 D2|12 // 238331 /	Zdhhc22	NM_001080943	0.00129126	0.105744	0.642244	-1.55704
NM_001141965 // Naa20 // N(alpha)-acetyltransferase 20, NatB catalytic subunit // 2 H1|	Naa20	NM_001141965	0.00130502	0.105744	0.796847	-1.25495
NM_001170705 // Dthd1 // death domain containing 1 // --- // 100322896	Dthd1	NM_001170705	0.00132955	0.105744	1.29089	1.29089
NM_010865 // Myoc // myocilin // 1 H2.1|1 83.6 cM // 17926 /// ENSMUST00000028020 // My	Myoc	NM_010865	0.00132981	0.105744	0.620266	-1.61221
NM_011034 // Prdx1 // peroxiredoxin 1 // 4 D1|4 47.0 cM // 18477 /// ENSMUST00000106470	Prdx1	NM_011034	0.00132437	0.105744	1.1668	1.1668
NM_024478 // Grpel1 // GrpE-like 1, mitochondrial // 5 B3|5 // 17713 /// ENSMUST0000003	Grpel1	NM_024478	0.00127826	0.105744	1.11576	1.11576
NM_026364 // Prpsap1 // phosphoribosyl pyrophosphate synthetase-associated protein 1 //	Prpsap1	NM_026364	0.00132947	0.105744	0.847026	-1.1806
NM_027594 // Ttll7 // tubulin tyrosine ligase-like family, member 7 // 3 H2|3 // 70892	Ttll7	NM_027594	0.00132086	0.105744	1.14472	1.14472
NM_029498 // Zmym2 // zinc finger, MYM-type 2 // 14 C3|14 // 76007 /// ENSMUST000000225	Zmym2	NM_029498	0.00131611	0.105744	1.11802	1.11802
NM_144891 // Gdap1l1 // ganglioside-induced differentiation-associated protein 1-like 1	Gdap1l1	NM_144891	0.00131701	0.105744	0.710645	-1.40717
NM_010880 // Ncl // nucleolin // 1 D|1 48.4 cM // 17975 /// ENSMUST00000027438 // Ncl /	Ncl	NM_010880	0.0013374	0.105888	1.15221	1.15221
NM_007417 // Adra2a // adrenergic receptor, alpha 2a // 19 D2|19 50.0 cM // 11551 /// E	Adra2a	NM_007417	0.00134601	0.106113	0.601656	-1.66208
NM_001003817 // Erbb2 // v-erb-b2 erythroblastic leukemia viral oncogene homolog 2, neu	Erbb2	NM_001003817	0.00138551	0.107308	1.13177	1.13177
NM_001034085 // Ppp2r1b // protein phosphatase 2 (formerly 2A), regulatory subunit A (P	Ppp2r1b	NM_001034085	0.00137653	0.107308	0.832852	-1.20069
NM_001162998 // 1110017F19Rik // RIKEN cDNA 1110017F19 gene // 11|11 // 68528 /// BC038	1110017F19Rik	NM_001162998	0.00138975	0.107308	1.18915	1.18915
NM_010191 // Fdft1 // farnesyl diphosphate farnesyl transferase 1 // 14 D1|14 3.0 cM //	Fdft1	NM_010191	0.00140634	0.107308	0.790645	-1.26479
NM_011497 // Aurka // aurora kinase A // 2 H3|2 100.0 cM // 20878 /// ENSMUST0000002899	Aurka	NM_011497	0.0013981	0.107308	1.16468	1.16468
NM_145839 // Rasgef1b // RasGEF domain family, member 1B // 5 E3|5 // 320292 /// NM_181	Rasgef1b	NM_145839	0.0014079	0.107308	1.5043	1.5043
NM_153508 // Clstn3 // calsyntenin 3 // 6 F2|6 // 232370 /// ENSMUST00000008297 // Clst	Clstn3	NM_153508	0.00140173	0.107308	0.846895	-1.18078
NM_183116 // 1110021L09Rik // RIKEN cDNA 1110021L09 gene // 10 A3-A4|10 // 76306 /// EN	1110021L09Rik	NM_183116	0.00136905	0.107308	0.780518	-1.2812
NM_001127177 // Ptpn2 // protein tyrosine phosphatase, non-receptor type 2 // 18 E1|18	Ptpn2	NM_001127177	0.00141948	0.107387	0.772558	-1.2944
NM_053244 // Kiss1r // KISS1 receptor // 10 C1|10 // 114229 /// ENSMUST00000045529 // K	Kiss1r	NM_053244	0.00142648	0.107387	0.88964	-1.12405
NM_172526 // Ttc24 // tetratricopeptide repeat domain 24 // 3 F1|3 // 214191 /// ENSMUS	Ttc24	NM_172526	0.00143288	0.107428	1.14939	1.14939
NM_001163262 // 4933407C03Rik // RIKEN cDNA 4933407C03 gene // 8 E1|8 // 74440 /// ENSM	4933407C03Rik	NM_001163262	0.00145716	0.108805	0.785233	-1.27351
NM_001033136 // Fam82a2 // family with sequence similarity 82, member A2 // 2 E5|2 // 6	Fam82a2	NM_001033136	0.00147364	0.10952	0.839621	-1.19101
NM_001081956 // Akap17b // A kinase (PRKA) anchor protein 17B // X A3.3|X // 338351 ///	Akap17b	NM_001081956	0.00148048	0.10952	0.853084	-1.17222
NM_001163819 // Fance // Fanconi anemia, complementation group E // 17 A3.3|17 // 72775	Fance	NM_001163819	0.00149043	0.10952	1.13387	1.13387
NM_178906 // AI593442 // expressed sequence AI593442 // 9 A5.3|9 // 330941 /// BC109328	AI593442	NM_178906	0.00149059	0.10952	1.30276	1.30276
NM_001014981 // Wdr7 // WD repeat domain 7 // 18|18 D1-E3 // 104082 /// ENSMUST00000072	Wdr7	NM_001014981	0.00149963	0.109557	0.897328	-1.11442
NM_011906 // Tpra1 // transmembrane protein, adipocyte asscociated 1 // 6|6 D2 // 24100	Tpra1	NM_011906	0.00152092	0.109557	0.843292	-1.18583
NM_021311 // Piwil1 // piwi-like homolog 1 (Drosophila) // 5 G1.3|5 72.0 cM // 57749 //	Piwil1	NM_021311	0.00151313	0.109557	1.06471	1.06471
NM_144886 // Exosc2 // exosome component 2 // 2 B|2 // 227715 /// ENSMUST00000038474 //	Exosc2	NM_144886	0.00151443	0.109557	0.845885	-1.18219
NR_033545 // Gm10790 // predicted gene 10790 // --- // 100038577 /// ENSMUST00000099561	Gm10790	NR_033545	0.00151811	0.109557	1.20726	1.20726
NM_053183 // Ddx50 // DEAD (Asp-Glu-Ala-Asp) box polypeptide 50 // 10 B4|10 // 94213 //	Ddx50	NM_053183	0.00154521	0.110578	0.779972	-1.2821
NM_145629 // Pls3 // plastin 3 (T-isoform) // X A7.3|X // 102866 /// NM_001166453 // Pl	Pls3	NM_145629	0.00154713	0.110578	0.758856	-1.31777
NM_011757 // Zscan21 // zinc finger and SCAN domain containing 21 // 5 G2|5 78.0 cM //	Zscan21	NM_011757	0.00156355	0.111319	0.89918	-1.11212
ENSMUST00000071059 // Gm10009 // predicted gene 10009 // --- // 791269	Gm10009	ENSMUST00000071059	0.00159998	0.111784	1.18585	1.18585
NM_007765 // Crmp1 // collapsin response mediator protein 1 // 5 B3|5 21.0 cM // 12933	Crmp1	NM_007765	0.00160394	0.111784	0.841334	-1.18859
NM_021281 // Ctss // cathepsin S // 3 F2.1|3 42.7 cM // 13040 /// ENSMUST00000015667 //	Ctss	NM_021281	0.00160206	0.111784	1.18388	1.18388
NM_021463 // Prps1 // phosphoribosyl pyrophosphate synthetase 1 // X F1-F2|X 60.0 cM //	Prps1	NM_021463	0.00160661	0.111784	0.813387	-1.22943
NM_023126 // Rab8a // RAB8A, member RAS oncogene family // 8 B3.3|8 33.0 cM // 17274 //	Rab8a	NM_023126	0.0015931	0.111784	0.8226	-1.21566
NM_145837 // Il17d // interleukin 17D // 14 C3|14 // 239114 /// ENSMUST00000089494 // I	Il17d	NM_145837	0.00158706	0.111784	0.845736	-1.1824
NM_029407 // 4933432B09Rik // RIKEN cDNA 4933432B09 gene // 15 E1|15 // 75729 /// ENSMU	4933432B09Rik	NM_029407	0.00162551	0.112673	0.836438	-1.19555
NM_016903 // Esd // esterase D/formylglutathione hydrolase // 14 D2-E2|14 41.5 cM // 13	Esd	NM_016903	0.00163737	0.113068	0.859682	-1.16322
BC029622 // 2310036O22Rik // RIKEN cDNA 2310036O22 gene // 8 C3|8 // 68544 /// ENSMUST0	2310036O22Rik	BC029622	0.00167719	0.114954	0.842167	-1.18741
NM_024191 // Arl2bp // ADP-ribosylation factor-like 2 binding protein // 8 C5|8 // 1075	Arl2bp	NM_024191	0.00167494	0.114954	0.875835	-1.14177
NM_009053 // Rfng // RFNG O-fucosylpeptide 3-beta-N-acetylglucosaminyltransferase // 11	Rfng	NM_009053	0.00169378	0.115659	0.859447	-1.16354
BC027508 // 1810030N24Rik // RIKEN cDNA 1810030N24 gene // 4 A5|4 // 66291 /// NM_02547	1810030N24Rik	BC027508	0.00173023	0.116417	1.20492	1.20492
NM_021538 // Cope // coatomer protein complex, subunit epsilon // 8 B3.3|8 // 59042 ///	Cope	NM_021538	0.00172347	0.116417	0.870043	-1.14937
NM_025696 // Sorcs3 // sortilin-related VPS10 domain containing receptor 3 // 19 D1|19	Sorcs3	NM_025696	0.0017284	0.116417	0.77107	-1.2969
NM_027187 // Rnaseh2a // ribonuclease H2, large subunit // 8 C3|8 // 69724 /// ENSMUST0	Rnaseh2a	NM_027187	0.00172118	0.116417	0.891749	-1.12139
NM_009466 // Ugdh // UDP-glucose dehydrogenase // 5 C3.1|5 38.0 cM // 22235 /// ENSMUST	Ugdh	NM_009466	0.00176139	0.116984	0.859678	-1.16323
NM_022004 // Fxyd6 // FXYD domain-containing ion transport regulator 6 // 9 A5.2|9 // 5	Fxyd6	NM_022004	0.0017705	0.116984	0.6138	-1.62919
NM_025858 // Shisa5 // shisa homolog 5 (Xenopus laevis) // 9 F2|9 // 66940 /// NM_02638	Shisa5	NM_025858	0.00175144	0.116984	0.855649	-1.1687
NM_030719 // Gatsl2 // GATS protein-like 2 // 5|5 G1 // 80909 /// ENSMUST00000016088 //	Gatsl2	NM_030719	0.00177042	0.116984	0.802302	-1.24641
NM_170597 // Creg2 // cellular repressor of E1A-stimulated genes 2 // 1 B|1 // 263764 /	Creg2	NM_170597	0.001766	0.116984	0.848338	-1.17878
NM_001039934 // Mtap2 // microtubule-associated protein 2 // 1 C3|1 33.7 cM // 17756 //	Mtap2	NM_001039934	0.00179428	0.117087	0.919337	-1.08774
NM_025554 // Polr2e // polymerase (RNA) II (DNA directed) polypeptide E // 10 C1|10 //	Polr2e	NM_025554	0.00179346	0.117087	0.814585	-1.22762
NM_144558 // Bivm // basic, immunoglobulin-like variable motif containing // 1 C1.1|1 /	Bivm	NM_144558	0.00179756	0.117087	1.09467	1.09467
NM_172281 // Rnf40 // ring finger protein 40 // 7 F3|7 // 233900 /// ENSMUST00000033088	Rnf40	NM_172281	0.00178443	0.117087	0.826625	-1.20974
NM_008823 // Cfp // complement factor properdin // X A3|X 6.2 cM // 18636 /// ENSMUST00	Cfp	NM_008823	0.00180716	0.117297	0.760393	-1.31511
NM_009575 // Zic3 // zinc finger protein of the cerebellum 3 // X A6|X 16.5 cM // 22773	Zic3	NM_009575	0.00181861	0.117312	0.796266	-1.25586
NM_175391 // Apol7c // apolipoprotein L 7c // 15 E1|15 // 108956 /// ENSMUST00000062562	Apol7c	NM_175391	0.00182169	0.117312	1.25177	1.25177
NM_181586 // Sirt6 // sirtuin 6 (silent mating type information regulation 2, homolog)	Sirt6	NM_181586	0.00182655	0.117312	0.886155	-1.12847
NM_030692 // Sacm1l // SAC1 (suppressor of actin mutations 1, homolog)-like (S. cerevis	Sacm1l	NM_030692	0.00183859	0.117673	0.864587	-1.15662
AK080921 // B430209F14Rik // RIKEN cDNA B430209F14 gene // 15 F1|15 // 320551	B430209F14Rik	AK080921	0.00199149	0.117905	1.28027	1.28027
ENSMUST00000029268 // 1810062G17Rik // RIKEN cDNA 1810062G17 gene // 3 B|3 // 72282	1810062G17Rik	ENSMUST00000029268	0.00194289	0.117905	1.13245	1.13245
ENSMUST00000054760 // Gm7075 // predicted gene 7075 // 10 B4|10 // 631906	Gm7075	ENSMUST00000054760	0.00189275	0.117905	1.17501	1.17501
NM_001007582 // AY761184 // cDNA sequence AY761184 // 8 A2|8 // 382000 /// ENSMUST00000	AY761184	NM_001007582	0.00207603	0.117905	1.18778	1.18778
NM_001033474 // Atxn7l3b // ataxin 7-like 3B // 10 D2|10 // 382423 /// ENSMUST000000992	Atxn7l3b	NM_001033474	0.00202839	0.117905	0.875709	-1.14193
NM_001039556 // Rad54b // RAD54 homolog B (S. cerevisiae) // 4 A1|4 // 623474 /// ENSMU	Rad54b	NM_001039556	0.00203789	0.117905	1.1923	1.1923
NM_001114312 // 4930506M07Rik // RIKEN cDNA 4930506M07 gene // 19 D3|19 // 71653 /// NM	4930506M07Rik	NM_001114312	0.00186845	0.117905	1.22162	1.22162
NM_001159328 // Hgs // HGF-regulated tyrosine kinase substrate // 11 E2|11 75.0 cM // 1	Hgs	NM_001159328	0.00197859	0.117905	0.800938	-1.24854
NM_001159697 // Ccdc48 // coiled-coil domain containing 48 // 6|6 D2 // 58229	Ccdc48	NM_001159697	0.00188231	0.117905	1.27187	1.27187
NM_001170433 // Ppfibp1 // PTPRF interacting protein, binding protein 1 (liprin beta 1)	Ppfibp1	NM_001170433	0.00204489	0.117905	0.754209	-1.32589
NM_007387 // Acp2 // acid phosphatase 2, lysosomal // 2 E1|2 52.0 cM // 11432 /// NM_02	Acp2	NM_007387	0.00206433	0.117905	0.875236	-1.14255
NM_008939 // Prss12 // protease, serine, 12 neurotrypsin (motopsin) // 3|3 G3 // 19142	Prss12	NM_008939	0.00200955	0.117905	0.597433	-1.67383
NM_009416 // Tpm2 // tropomyosin 2, beta // 4 B1|4 // 22004 /// ENSMUST00000030184 // T	Tpm2	NM_009416	0.00189519	0.117905	1.19597	1.19597
NM_010439 // Hmgb1 // high mobility group box 1 // 5 G3|5 83.0 cM // 15289 /// L38477 /	Hmgb1	NM_010439	0.00201882	0.117905	1.08969	1.08969
NM_019632 // Napb // N-ethylmaleimide sensitive fusion protein attachment protein beta	Napb	NM_019632	0.00185599	0.117905	0.803256	-1.24493
NM_021537 // Stk25 // serine/threonine kinase 25 (yeast) // 1 D|1 58.0 cM // 59041 ///	Stk25	NM_021537	0.00203571	0.117905	0.888826	-1.12508
NM_024172 // Hspbp1 // HSPA (heat shock 70kDa) binding protein, cytoplasmic cochaperone	Hspbp1	NM_024172	0.0020797	0.117905	0.86575	-1.15507
NM_025724 // 4921510H08Rik // RIKEN cDNA 4921510H08 gene // 10 C3|10 // 66716 /// ENSMU	4921510H08Rik	NM_025724	0.00198011	0.117905	1.12648	1.12648
NM_025900 // Dek // DEK oncogene (DNA binding) // 13 B1|13 28.0 cM // 110052 /// ENSMUS	Dek	NM_025900	0.00198846	0.117905	1.15556	1.15556
NM_026278 // Lrp2bp // Lrp2 binding protein // 8|8 B2 // 67620 /// ENSMUST00000110381 /	Lrp2bp	NM_026278	0.00193952	0.117905	1.11417	1.11417
NM_026432 // Tmem66 // transmembrane protein 66 // 8 A4|8 // 67887 /// ENSMUST000000339	Tmem66	NM_026432	0.00198729	0.117905	0.851124	-1.17492
NM_028870 // Cltb // clathrin, light polypeptide (Lcb) // 13 B1|13 // 74325 /// ENSMUST	Cltb	NM_028870	0.00206065	0.117905	0.841891	-1.1878
NM_029688 // Srxn1 // sulfiredoxin 1 homolog (S. cerevisiae) // 2|2 H1 // 76650 /// ENS	Srxn1	NM_029688	0.00207298	0.117905	0.781571	-1.27947
NM_030137 // Cstad // CSA-conditional, T cell activation-dependent protein // 2 B|2 //	Cstad	NM_030137	0.00198715	0.117905	1.47706	1.47706
NM_030262 // Pofut2 // protein O-fucosyltransferase 2 // 10 C1|10 // 80294 /// ENSMUST0	Pofut2	NM_030262	0.00188334	0.117905	0.816656	-1.22451
NM_133715 // Arhgap27 // Rho GTPase activating protein 27 // 11 E1|11 // 544817 /// ENS	Arhgap27	NM_133715	0.00187226	0.117905	1.16822	1.16822
NM_139270 // Pth2r // parathyroid hormone 2 receptor // 1 C2|1 41.5 cM // 213527 /// EN	Pth2r	NM_139270	0.00194655	0.117905	0.770268	-1.29825
NM_153791 // Flywch1 // FLYWCH-type zinc finger 1 // 17 A3.3|17 // 224613 /// ENSMUST00	Flywch1	NM_153791	0.0020631	0.117905	0.859778	-1.16309
NM_172126 // Adam1a // a disintegrin and metallopeptidase domain 1a // 5 F|5 65.0 cM //	Adam1a	NM_172126	0.00203211	0.117905	0.7838	-1.27584
NM_172768 // Gramd1b // GRAM domain containing 1B // 9|9 B // 235283 /// ENSMUST0000004	Gramd1b	NM_172768	0.00199796	0.117905	0.86936	-1.15027
NM_173743 // Apol9b // apolipoprotein L 9b // 15 E1|15 // 71898 /// NM_001168660 // Apo	Apol9b	NM_173743	0.00197372	0.117905	1.11532	1.11532
NM_175033 // BC089491 // cDNA sequence BC089491 // 7 A3|7 // 280621 /// ENSMUST00000056	BC089491	NM_175033	0.00205751	0.117905	1.23463	1.23463
NM_201531 // Kcnf1 // potassium voltage-gated channel, subfamily F, member 1 // 12 A1.1	Kcnf1	NM_201531	0.00198029	0.117905	0.714711	-1.39917
NR_024329 // 2900097C17Rik // RIKEN cDNA 2900097C17 gene // 2 H1|2 // 347740 /// ENSMUS	2900097C17Rik	NR_024329	0.00196348	0.117905	0.86865	-1.15121
NR_029812 // Mir135a-2 // microRNA 135a-2 // 10|10 // 723955	Mir135a-2	NR_029812	0.00200402	0.117905	0.8204	-1.21892
NR_033617 // Gm12830 // predicted gene 12830 // 4 D1|4 // 433746 /// ENSMUST00000068632	Gm12830	NR_033617	0.00186591	0.117905	1.07632	1.07632
ENSMUST00000079376 // 1700104B16Rik // RIKEN cDNA 1700104B16 gene // 8 A3|8 // 78636	1700104B16Rik	ENSMUST00000079376	0.00218844	0.118459	1.09448	1.09448
ENSMUST00000097577 // Gm10538 // predicted gene 10538 // --- // 100038653	Gm10538	ENSMUST00000097577	0.00220534	0.118459	1.20037	1.20037
NM_001029982 // Sec23ip // Sec23 interacting protein // 7 F3|7 61.0 cM // 207352 /// EN	Sec23ip	NM_001029982	0.00219144	0.118459	0.885328	-1.12952
NM_001109906 // Stau1 // staufen (RNA binding protein) homolog 1 (Drosophila) // 2 H3|2	Stau1	NM_001109906	0.00215111	0.118459	0.926468	-1.07937
NM_001162870 // Spast // spastin // 17|17 E3 // 50850 /// NM_016962 // Spast // spastin	Spast	NM_001162870	0.00219441	0.118459	0.847183	-1.18038
NM_007460 // Ap3d1 // adaptor-related protein complex 3, delta 1 subunit // 10 C1|10 43	Ap3d1	NM_007460	0.00217507	0.118459	0.883952	-1.13128
NM_009215 // Sst // somatostatin // 16 cen-C3|16 19.0 cM // 20604 /// ENSMUST0000000448	Sst	NM_009215	0.00212424	0.118459	0.843682	-1.18528
NM_009840 // Cct8 // chaperonin containing Tcp1, subunit 8 (theta) // 16 C3.3|16 // 124	Cct8	NM_009840	0.00220586	0.118459	0.863493	-1.15809
NM_011349 // Sema3f // sema domain, immunoglobulin domain (Ig), short basic domain, sec	Sema3f	NM_011349	0.00218335	0.118459	1.14245	1.14245
NM_018783 // Tfip11 // tuftelin interacting protein 11 // 5 F|5 // 54723 /// ENSMUST000	Tfip11	NM_018783	0.00222168	0.118459	0.891725	-1.12142
NM_020285 // Tssc4 // tumor-suppressing subchromosomal transferable fragment 4 // 7 F5|	Tssc4	NM_020285	0.00214851	0.118459	0.854678	-1.17003
NM_022332 // St7 // suppression of tumorigenicity 7 // 6 A2|6 // 64213 /// NM_001083315	St7	NM_022332	0.00211995	0.118459	0.8626	-1.15929
NM_023565 // Cse1l // chromosome segregation 1-like (S. cerevisiae) // 2 H3|2 74.2 cM /	Cse1l	NM_023565	0.00217225	0.118459	0.911661	-1.0969
NM_025648 // Farsa // phenylalanyl-tRNA synthetase, alpha subunit // 8 C3|8 // 66590 //	Farsa	NM_025648	0.00217191	0.118459	0.886012	-1.12865
NM_025899 // Uqcrc2 // ubiquinol cytochrome c reductase core protein 2 // 7 F2|7 // 670	Uqcrc2	NM_025899	0.00213509	0.118459	0.900064	-1.11103
NM_028224 // Faim2 // Fas apoptotic inhibitory molecule 2 // 15|15 F3 // 72393 /// NM_0	Faim2	NM_028224	0.00221336	0.118459	0.824487	-1.21288
NM_153560 // Fam102a // family with sequence similarity 102, member A // 2 B|2 // 98952	Fam102a	NM_153560	0.0022249	0.118459	1.18745	1.18745
NM_198409 // Rai2 // retinoic acid induced 2 // X F4|X // 24004 /// NM_001103367 // Rai	Rai2	NM_198409	0.00215832	0.118459	0.851424	-1.1745
NM_207203 // BC068157 // cDNA sequence BC068157 // 8 A1.1|8 // 73072 /// ENSMUST0000007	BC068157	NM_207203	0.00214079	0.118459	0.696741	-1.43525
NR_030419 // Mir216b // microRNA 216b // 11|11 // 735308	Mir216b	NR_030419	0.0022071	0.118459	1.19189	1.19189
NR_033549 // Gm11190 // predicted gene 11190 // --- // 791423	Gm11190	NR_033549	0.00209691	0.118459	1.22276	1.22276
NM_033398 // Jmjd6 // jumonji domain containing 6 // 11 E2|11 75.0 cM // 107817 /// ENS	Jmjd6	NM_033398	0.00223867	0.118847	0.835175	-1.19735
NM_026007 // Eef1g // eukaryotic translation elongation factor 1 gamma // 19 A|19 // 67	Eef1g	NM_026007	0.00226008	0.119411	0.810025	-1.23453
NM_053272 // Dhcr24 // 24-dehydrocholesterol reductase // 4 C7|4 // 74754 /// ENSMUST00	Dhcr24	NM_053272	0.00226229	0.119411	0.808916	-1.23622
NM_001013012 // Zfp787 // zinc finger protein 787 // 7 A1|7 // 67109 /// ENSMUST0000009	Zfp787	NM_001013012	0.0022732	0.119643	1.17474	1.17474
NM_001101585 // Gm6927 // predicted pseudogene 6927 // X A7.3|X // 628893	Gm6927	NM_001101585	0.00239291	0.119951	1.16368	1.16368
NM_001145827 // Stk40 // serine/threonine kinase 40 // 4 D2.2|4 // 74178 /// NM_028800	Stk40	NM_001145827	0.00240865	0.119951	0.748276	-1.33641
NM_001166062 // Gm16381 // predicted gene 16381 // 12 D2|12 // 100042786	Gm16381	NM_001166062	0.00228567	0.119951	1.19732	1.19732
NM_008760 // Ogn // osteoglycin // 13 A5|13 // 18295 /// ENSMUST00000021822 // Ogn // o	Ogn	NM_008760	0.00238702	0.119951	0.460649	-2.17085
NM_008999 // Rab23 // RAB23, member RAS oncogene family // 1 B|1 18.5 cM // 19335 /// N	Rab23	NM_008999	0.00237743	0.119951	0.867284	-1.15302
NM_009252 // Serpina3n // serine (or cysteine) peptidase inhibitor, clade A, member 3N	Serpina3n	NM_009252	0.00232733	0.119951	0.670953	-1.49042
NM_011287 // Rpl10a // ribosomal protein L10A // 17 A3.3|17 // 19896 /// U12403 // Rpl1	Rpl10a	NM_011287	0.00230569	0.119951	0.904041	-1.10615
NM_011738 // Ywhah // tyrosine 3-monooxygenase/tryptophan 5-monooxygenase activation pr	Ywhah	NM_011738	0.00240052	0.119951	0.880476	-1.13575
NM_013560 // Hspb1 // heat shock protein 1 // 5 G2|5 76.0 cM // 15507 /// ENSMUST000000	Hspb1	NM_013560	0.00235754	0.119951	0.685101	-1.45964
NM_016843 // Atxn10 // ataxin 10 // 15 E2|15 // 54138 /// ENSMUST00000016685 // Atxn10	Atxn10	NM_016843	0.00231421	0.119951	0.86123	-1.16113
NM_019737 // B4galt6 // UDP-Gal:betaGlcNAc beta 1,4-galactosyltransferase, polypeptide	B4galt6	NM_019737	0.00238989	0.119951	0.910703	-1.09805
NM_024273 // 4930455C21Rik // RIKEN cDNA 4930455C21 gene // 16 B4|16 // 76916 /// ENSMU	4930455C21Rik	NM_024273	0.0023516	0.119951	0.823201	-1.21477
NM_026517 // Rpl22l1 // ribosomal protein L22 like 1 // 3 A3|3 // 68028 /// ENSMUST0000	Rpl22l1	NM_026517	0.0023236	0.119951	1.12228	1.12228
NM_026638 // Cdipt // CDP-diacylglycerol--inositol 3-phosphatidyltransferase (phosphati	Cdipt	NM_026638	0.00236138	0.119951	0.84801	-1.17923
NM_027959 // Pdia6 // protein disulfide isomerase associated 6 // 12 A1.1|12 // 71853 /	Pdia6	NM_027959	0.00232195	0.119951	0.782086	-1.27863
NM_027980 // 2310003H01Rik // RIKEN cDNA 2310003H01 gene // 11 E2|11 // 71885 /// BC034	2310003H01Rik	NM_027980	0.00234297	0.119951	0.891137	-1.12216
NM_028011 // Tom1l1 // target of myb1-like 1 (chicken) // 11 D|11 53.0 cM // 71943 ///	Tom1l1	NM_028011	0.00233158	0.119951	1.15929	1.15929
NM_145144 // Aif1l // allograft inflammatory factor 1-like // 2 B|2 // 108897 /// ENSMU	Aif1l	NM_145144	0.00229911	0.119951	1.20309	1.20309
NM_198599 // Map6d1 // MAP6 domain containing 1 // 16 A3|16 // 208158 /// ENSMUST000000	Map6d1	NM_198599	0.00240965	0.119951	1.2136	1.2136
AK165889 // Gm10419 // predicted gene 10419 // 5 E5|5 // 100038441	Gm10419	AK165889	0.00241711	0.119997	1.17392	1.17392
NM_011971 // Psmb3 // proteasome (prosome, macropain) subunit, beta type 3 // 11 D|11 5	Psmb3	NM_011971	0.00242917	0.12027	0.889521	-1.1242
NM_008995 // Pex5 // peroxisomal biogenesis factor 5 // 6 F2|6 59.6 cM // 19305 /// NM_	Pex5	NM_008995	0.0024822	0.121512	0.850574	-1.17568
NM_009324 // Tbx2 // T-box 2 // 11 C|11 49.0 cM // 21385 /// ENSMUST00000000095 // Tbx2	Tbx2	NM_009324	0.00249064	0.121512	1.14051	1.14051
NM_009805 // Cflar // CASP8 and FADD-like apoptosis regulator // 1 C1.3|1 30.1 cM // 12	Cflar	NM_009805	0.00247813	0.121512	0.839547	-1.19112
NM_010338 // Gpr37 // G protein-coupled receptor 37 // 6 A3.1|6 7.2 cM // 14763 /// ENS	Gpr37	NM_010338	0.00248083	0.121512	1.38506	1.38506
NM_133754 // Fblim1 // filamin binding LIM protein 1 // 4 E1|4 // 74202 /// NM_00116325	Fblim1	NM_133754	0.00249394	0.121512	1.2667	1.2667
NM_146091 // Atl3 // atlastin GTPase 3 // 19 A|19 // 109168 /// NM_001163505 // Atl3 //	Atl3	NM_146091	0.0024735	0.121512	1.09147	1.09147
NM_025434 // Mrps28 // mitochondrial ribosomal protein S28 // 3 A1|3 // 66230 /// ENSMU	Mrps28	NM_025434	0.00251005	0.121652	1.13785	1.13785
NM_026988 // Ptms // parathymosin // 6 F2|6 // 69202 /// ENSMUST00000032216 // Ptms //	Ptms	NM_026988	0.00250595	0.121652	1.118	1.118
NM_001033876 // Kcnk9 // potassium channel, subfamily K, member 9 // 15 D3|15 // 223604	Kcnk9	NM_001033876	0.00252682	0.121822	0.547994	-1.82484
NM_009801 // Car2 // carbonic anhydrase 2 // 3 A1|3 10.5 cM // 12349 /// ENSMUST0000002	Car2	NM_009801	0.00252576	0.121822	1.2669	1.2669
NM_010050 // Dio2 // deiodinase, iodothyronine, type II // 12 D3|12 // 13371 /// ENSMUS	Dio2	NM_010050	0.00261104	0.122057	0.773626	-1.29261
NM_013628 // Pcsk1 // proprotein convertase subtilisin/kexin type 1 // 13 C2|13 44.0 cM	Pcsk1	NM_013628	0.00254363	0.122057	0.602257	-1.66042
NM_016889 // Insm1 // insulinoma-associated 1 // 2 G1|2 // 53626 /// ENSMUST00000089257	Insm1	NM_016889	0.00260868	0.122057	1.15633	1.15633
NM_021467 // Tnni1 // troponin I, skeletal, slow 1 // 1 E4|1 60.0 cM // 21952 /// NM_00	Tnni1	NM_021467	0.00257113	0.122057	1.22066	1.22066
NM_026416 // S100a16 // S100 calcium binding protein A16 // 3|3 F1-F2 // 67860 /// BC02	S100a16	NM_026416	0.00255605	0.122057	1.20374	1.20374
NM_133962 // Arhgef18 // rho/rac guanine nucleotide exchange factor (GEF) 18 // 8 A1.1|	Arhgef18	NM_133962	0.00255681	0.122057	0.870776	-1.1484
NM_145429 // Arrb2 // arrestin, beta 2 // 11 B3|11 45.0 cM // 216869 /// ENSMUST0000010	Arrb2	NM_145429	0.00256093	0.122057	0.833504	-1.19975
NM_175007 // Amph // amphiphysin // 13 A2|13 10.0 cM // 218038 /// ENSMUST00000003345 /	Amph	NM_175007	0.00261143	0.122057	0.790633	-1.26481
NM_175386 // Lhfp // lipoma HMGIC fusion partner // 3 C|3 // 108927 /// BC052079 // Lhf	Lhfp	NM_175386	0.00260703	0.122057	0.733694	-1.36297
NM_177366 // Gpr157 // G protein-coupled receptor 157 // 4 E2|4 // 269604 /// BC117996	Gpr157	NM_177366	0.00259876	0.122057	1.13389	1.13389
NM_201357 // Tssc1 // tumor suppressing subtransferable candidate 1 // 12 A2|12 10.0 cM	Tssc1	NM_201357	0.00261006	0.122057	0.867831	-1.1523
NR_027897 // 0610012G03Rik // RIKEN cDNA 0610012G03 gene // 16 B2|16 // 106264 /// BC02	0610012G03Rik	NR_027897	0.00257762	0.122057	0.807535	-1.23834
ENSMUST00000066183 // 1500015L24Rik // RIKEN cDNA 1500015L24 gene // 19 B|19 // 68994	1500015L24Rik	ENSMUST00000066183	0.00262108	0.122197	1.53569	1.53569
NM_011859 // Osr1 // odd-skipped related 1 (Drosophila) // 12 A1.1|12 1.0 cM // 23967 /	Osr1	NM_011859	0.0026352	0.122235	0.587569	-1.70193
NM_025660 // Ribc1 // RIB43A domain with coiled-coils 1 // X F3|X // 66611 /// ENSMUST0	Ribc1	NM_025660	0.00262909	0.122235	1.06474	1.06474
NM_001081354 // Mamld1 // mastermind-like domain containing 1 // X A7.2|X // 333639 ///	Mamld1	NM_001081354	0.0026858	0.122433	0.840537	-1.18972
NM_001167949 // Atp2b4 // ATPase, Ca++ transporting, plasma membrane 4 // 1 E4|1 70.3 c	Atp2b4	NM_001167949	0.00268628	0.122433	0.59525	-1.67997
NM_009837 // Cct4 // chaperonin containing Tcp1, subunit 4 (delta) // 11 A3.2|11 13.0 c	Cct4	NM_009837	0.00267801	0.122433	0.876609	-1.14076
NM_024435 // Nts // neurotensin // 10 D1|10 // 67405 /// ENSMUST00000020040 // Nts // n	Nts	NM_024435	0.00266034	0.122433	0.452606	-2.20942
NM_133739 // Tmem123 // transmembrane protein 123 // 9 A1|9 // 71929 /// ENSMUST0000005	Tmem123	NM_133739	0.00268519	0.122433	1.23096	1.23096
NM_138309 // Cd99l2 // CD99 antigen-like 2 // X A6-B|X // 171486 /// ENSMUST00000080035	Cd99l2	NM_138309	0.00265662	0.122433	0.845252	-1.18308
NM_138649 // Syt17 // synaptotagmin XVII // 7 F2|7 56.0 cM // 110058 /// ENSMUST0000008	Syt17	NM_138649	0.00269281	0.122433	0.459715	-2.17526
NM_010837 // Mtap6 // microtubule-associated protein 6 // 7|7 E2-F1 // 17760 /// NM_001	Mtap6	NM_010837	0.00270222	0.122558	0.862964	-1.1588
NR_004414 // Rnu2 // U2 small nuclear RNA // --- // 19848 /// NR_004414 // Rnu2 // U2 s	Rnu2	NR_004414	0.00271495	0.122832	1.12428	1.12428
NM_146735 // Olfr483 // olfactory receptor 483 // 7 E3|7 // 258730 /// ENSMUST000001049	Olfr483	NM_146735	0.00272409	0.122942	1.15794	1.15794
NM_177602 // Wdr25 // WD repeat domain 25 // 12 F1|12 // 212198	Wdr25	NM_177602	0.00273136	0.122969	1.1626	1.1626
NM_011112 // Papola // poly (A) polymerase alpha // 12|12 F1 // 18789 /// ENSMUST000001	Papola	NM_011112	0.00274444	0.123024	0.918756	-1.08843
NM_133737 // Lancl2 // LanC (bacterial lantibiotic synthetase component C)-like 2 // 6|	Lancl2	NM_133737	0.00274599	0.123024	0.796467	-1.25554
NM_029726 // Trdn // triadin // 10 A4|10 // 76757 /// ENSMUST00000050626 // Trdn // tri	Trdn	NM_029726	0.00275538	0.123144	0.829045	-1.20621
NM_146996 // Olfr177 // olfactory receptor 177 // 16 C2|16 // 258998 /// NM_146993 // O	Olfr177	NM_146996	0.00276519	0.123283	0.910125	-1.09875
ENSMUST00000028347 // Rbms1 // RNA binding motif, single stranded interacting protein 1	Rbms1	ENSMUST00000028347	0.00295576	0.123335	1.34395	1.34395
ENSMUST00000109592 // Fam81b // family with sequence similarity 81, member B // 13 C1|1	Fam81b	ENSMUST00000109592	0.00292697	0.123335	1.12929	1.12929
NM_001029842 // Slc16a6 // solute carrier family 16 (monocarboxylic acid transporters),	Slc16a6	NM_001029842	0.00293219	0.123335	1.27702	1.27702
NM_001039644 // Edem3 // ER degradation enhancer, mannosidase alpha-like 3 // 1 G2|1 //	Edem3	NM_001039644	0.00308708	0.123335	0.904708	-1.10533
NM_001081241 // Fam65a // family with sequence similarity 65, member A // 8 D3|8 // 756	Fam65a	NM_001081241	0.0032116	0.123335	0.895752	-1.11638
NM_001081307 // Ppp1r12b // protein phosphatase 1, regulatory (inhibitor) subunit 12B /	Ppp1r12b	NM_001081307	0.00318	0.123335	0.838262	-1.19294
NM_001081977 // Rnf144a // ring finger protein 144A // 12|12 A3 // 108089 /// NM_080563	Rnf144a	NM_001081977	0.00279978	0.123335	1.29377	1.29377
NM_001099628 // Atad2b // ATPase family, AAA domain containing 2B // 12 A1.1|12 // 3208	Atad2b	NM_001099628	0.0028935	0.123335	0.85962	-1.1633
NM_007459 // Ap2a2 // adaptor protein complex AP-2, alpha 2 subunit // 7 F5|7 // 11772	Ap2a2	NM_007459	0.00312941	0.123335	0.902584	-1.10793
NM_008067 // Gabra3 // gamma-aminobutyric acid (GABA) A receptor, subunit alpha 3 // X	Gabra3	NM_008067	0.00286874	0.123335	0.637201	-1.56936
NM_008141 // Gnat2 // guanine nucleotide binding protein, alpha transducing 2 // 3 F2.3	Gnat2	NM_008141	0.00312008	0.123335	1.11719	1.11719
NM_008577 // Slc3a2 // solute carrier family 3 (activators of dibasic and neutral amino	Slc3a2	NM_008577	0.0030643	0.123335	0.888554	-1.12542
NM_008617 // Mdh2 // malate dehydrogenase 2, NAD (mitochondrial) // 5 G2|5 78.0 cM // 1	Mdh2	NM_008617	0.00287986	0.123335	0.918197	-1.08909
NM_008989 // Pura // purine rich element binding protein A // 18|18 B3 // 19290 /// U02	Pura	NM_008989	0.00294313	0.123335	0.956816	-1.04513
NM_009277 // Trim21 // tripartite motif-containing 21 // 7 F1|7 // 20821 /// NM_0010825	Trim21	NM_009277	0.0028742	0.123335	1.16426	1.16426
NM_009675 // Aoc3 // amine oxidase, copper containing 3 // 11|11 B2-B5 // 11754 /// ENS	Aoc3	NM_009675	0.00321603	0.123335	1.16202	1.16202
NM_010266 // Gda // guanine deaminase // 19 B|19 15.5 cM // 14544 /// ENSMUST0000008760	Gda	NM_010266	0.00307562	0.123335	0.765915	-1.30563
NM_010340 // Gpr50 // G-protein-coupled receptor 50 // X A7.2|X 26.0 cM // 14765 /// EN	Gpr50	NM_010340	0.00307454	0.123335	0.644586	-1.55138
NM_010745 // Ly86 // lymphocyte antigen 86 // 13 A3.3|13 // 17084 /// ENSMUST0000002186	Ly86	NM_010745	0.0031201	0.123335	1.23297	1.23297
NM_011930 // Clcn7 // chloride channel 7 // 17 A3.3|17 10.0 cM // 26373 /// ENSMUST0000	Clcn7	NM_011930	0.00281059	0.123335	0.877748	-1.13928
NM_012031 // Spag1 // sperm associated antigen 1 // 15|15 C // 26942 /// ENSMUST0000004	Spag1	NM_012031	0.00297163	0.123335	0.858523	-1.16479
NM_016882 // Sart1 // squamous cell carcinoma antigen recognized by T-cells 1 // 19 A|1	Sart1	NM_016882	0.00316911	0.123335	0.800357	-1.24944
NM_019410 // Pfn2 // profilin 2 // 3 D|3 29.3 cM // 18645 /// ENSMUST00000066882 // Pfn	Pfn2	NM_019410	0.00301875	0.123335	0.897138	-1.11466
NM_019510 // Trpc3 // transient receptor potential cation channel, subfamily C, member	Trpc3	NM_019510	0.00302357	0.123335	1.24172	1.24172
NM_019537 // Psmg1 // proteasome (prosome, macropain) assembly chaperone 1 // 16 C4|16	Psmg1	NM_019537	0.00297589	0.123335	0.728103	-1.37343
NM_021568 // Pcbp3 // poly(rC) binding protein 3 // 10|10 B5.1-B5.3 // 59093 /// ENSMUS	Pcbp3	NM_021568	0.00318725	0.123335	0.776116	-1.28847
NM_022328 // Mllt1 // myeloid/lymphoid or mixed-lineage leukemia (trithorax homolog, Dr	Mllt1	NM_022328	0.00323637	0.123335	0.774173	-1.2917
NM_024174 // Mrps23 // mitochondrial ribosomal protein S23 // 11 C|11 48.0 cM // 64656	Mrps23	NM_024174	0.00298337	0.123335	0.859485	-1.16349
NM_025441 // Sdccag1 // serologically defined colon cancer antigen 1 // 12|12 C3 // 662	Sdccag1	NM_025441	0.00318414	0.123335	1.13899	1.13899
NM_025863 // Trim59 // tripartite motif-containing 59 // 3|3 E2 // 66949 /// BC025430 /	Trim59	NM_025863	0.00289429	0.123335	1.38784	1.38784
NM_026500 // Ddx59 // DEAD (Asp-Glu-Ala-Asp) box polypeptide 59 // 1|1 F // 67997 /// E	Ddx59	NM_026500	0.00320685	0.123335	1.1157	1.1157
NM_026517 // Rpl22l1 // ribosomal protein L22 like 1 // 3 A3|3 // 68028 /// ENSMUST0000	Rpl22l1	NM_026517	0.00319584	0.123335	1.1145	1.1145
NM_026551 // Dcakd // dephospho-CoA kinase domain containing // 11 E1|11 // 68087 /// E	Dcakd	NM_026551	0.00323602	0.123335	0.828007	-1.20772
NM_027032 // Pacrg // PARK2 co-regulated // 17 A2|17 5.9 cM // 69310 /// ENSMUST0000004	Pacrg	NM_027032	0.0032004	0.123335	0.786724	-1.27109
NM_027100 // Rwdd2a // RWD domain containing 2A // 9 E3.1|9 // 69519 /// NM_001145968 /	Rwdd2a	NM_027100	0.0029274	0.123335	0.611588	-1.63509
NM_028457 // Dem1 // defects in morphology 1 homolog (S. cerevisiae) // 4 D2.2|4 // 731	Dem1	NM_028457	0.00313423	0.123335	1.15815	1.15815
NM_029896 // Wdr82 // WD repeat domain containing 82 // 9 F1|9 // 77305 /// ENSMUST0000	Wdr82	NM_029896	0.00318149	0.123335	0.890464	-1.12301
NM_030188 // Ttc30a1 // tetratricopeptide repeat domain 30A1 // 2|2 // 78802 /// ENSMUS	Ttc30a1	NM_030188	0.00287568	0.123335	0.82554	-1.21133
NM_053204 // Erc1 // ELKS/RAB6-interacting/CAST family member 1 // 6 F1|6 // 111173 ///	Erc1	NM_053204	0.00289645	0.123335	0.847123	-1.18047
NM_080461 // Zfp358 // zinc finger protein 358 // 8 A1.1|8 1.0 cM // 140482 /// ENSMUST	Zfp358	NM_080461	0.00311974	0.123335	0.926544	-1.07928
NM_133660 // Ces1e // carboxylesterase 1E // 8 C5|8 43.2 cM // 13897 /// ENSMUST0000003	Ces1e	NM_133660	0.00323244	0.123335	1.17215	1.17215
NM_138948 // Cabp7 // calcium binding protein 7 // 11 A1|11 // 192650 /// ENSMUST000000	Cabp7	NM_138948	0.00304731	0.123335	0.618767	-1.61612
NM_145133 // Tifa // TRAF-interacting protein with forkhead-associated domain // 3 G2|3	Tifa	NM_145133	0.00318656	0.123335	1.1159	1.1159
NM_146051 // 3830406C13Rik // RIKEN cDNA 3830406C13 gene // 14 A1|14 // 218734 /// NM_1	3830406C13Rik	NM_146051	0.00314573	0.123335	1.17361	1.17361
NM_153094 // Klrb1f // killer cell lectin-like receptor subfamily B member 1F // 6 F3|6	Klrb1f	NM_153094	0.00284812	0.123335	1.12486	1.12486
NM_153502 // Ankrd23 // ankyrin repeat domain 23 // 1 B|1 // 78321 /// NM_026241 // Ank	Ankrd23	NM_153502	0.0030168	0.123335	0.903501	-1.10681
NM_153573 // Fkbp14 // FK506 binding protein 14 // 6 B3|6 // 231997 /// ENSMUST00000046	Fkbp14	NM_153573	0.00304821	0.123335	0.76511	-1.307
NM_153600 // Ttc26 // tetratricopeptide repeat domain 26 // 6 B1|6 // 264134 /// ENSMUS	Ttc26	NM_153600	0.0028367	0.123335	0.819334	-1.2205
NM_172773 // Slc17a5 // solute carrier family 17 (anion/sugar transporter), member 5 //	Slc17a5	NM_172773	0.00322088	0.123335	0.849095	-1.17772
NM_172876 // Gpatch3 // G patch domain containing 3 // 4 D2.3|4 // 242691 /// ENSMUST00	Gpatch3	NM_172876	0.00306548	0.123335	1.08157	1.08157
NM_173416 // BC068281 // cDNA sequence BC068281 // 12 A1.1|12 // 238037 /// NM_00117085	BC068281	NM_173416	0.00277681	0.123335	0.904254	-1.10588
NM_173868 // St18 // suppression of tumorigenicity 18 // 1 A1|1 // 240690 /// ENSMUST00	St18	NM_173868	0.00303669	0.123335	1.3534	1.3534
NM_175095 // Commd2 // COMM domain containing 2 // 3 D|3 30.0 cM // 52245 /// ENSMUST00	Commd2	NM_175095	0.00322746	0.123335	0.878189	-1.13871
NM_175423 // Orai1 // ORAI calcium release-activated calcium modulator 1 // 5 F|5 // 10	Orai1	NM_175423	0.00278165	0.123335	1.15942	1.15942
NM_175543 // Rab11fip4 // RAB11 family interacting protein 4 (class II) // 11 B5|11 46.	Rab11fip4	NM_175543	0.00320961	0.123335	0.861414	-1.16088
NM_177271 // Samd5 // sterile alpha motif domain containing 5 // 10 A1|10 // 320825 ///	Samd5	NM_177271	0.00295286	0.123335	1.26747	1.26747
NM_182841 // Tmem150c // transmembrane protein 150C // 5 E4|5 // 231503 /// ENSMUST0000	Tmem150c	NM_182841	0.00283144	0.123335	0.829634	-1.20535
NM_183096 // Ttc29 // tetratricopeptide repeat domain 29 // 8 C1|8 // 73301 /// ENSMUST	Ttc29	NM_183096	0.00308695	0.123335	1.11413	1.11413
NM_183355 // Pbx1 // pre B-cell leukemia transcription factor 1 // 1 H2.3|1 88.1 cM //	Pbx1	NM_183355	0.00293587	0.123335	0.840734	-1.18944
NR_028314 // 4833422C13Rik // RIKEN cDNA 4833422C13 gene // 13C3|13 // 373852	4833422C13Rik	NR_028314	0.00280237	0.123335	0.864575	-1.15664
NR_028542 // Snord8 // small nucleolar RNA, C/D box 8 // 14|14 // 100217445	Snord8	NR_028542	0.00310286	0.123335	1.10794	1.10794
NR_029838 // Mir219-2 // microRNA 219-2 // 2|2 // 723904	Mir219-2	NR_029838	0.00294238	0.123335	1.40869	1.40869
NR_033539 // Gm12298 // predicted gene 12298 // --- // 100038666	Gm12298	NR_033539	0.00322144	0.123335	1.15562	1.15562
XM_003086016 // Gm10237 // predicted gene 10237 // 16 B3|16 // 100043217	Gm10237	XM_003086016	0.00295555	0.123335	1.16811	1.16811
NM_022310 // Hspa5 // heat shock protein 5 // 2 B|2 22.5 cM // 14828 /// NM_001163434 /	Hspa5	NM_022310	0.0032497	0.123587	0.7734	-1.29299
NM_001101560 // Cldn20 // claudin 20 // 17 A1|17 // 621628	Cldn20	NM_001101560	0.00327435	0.123894	1.16711	1.16711
NM_009833 // Ccnt1 // cyclin T1 // 15|15 F2 // 12455 /// ENSMUST00000012104 // Ccnt1 //	Ccnt1	NM_009833	0.00328948	0.123894	0.836176	-1.19592
NM_011494 // Stk16 // serine/threonine kinase 16 // 1 C3|1 // 20872 /// NM_009447 // Tu	Stk16	NM_011494	0.00330839	0.123894	0.860484	-1.16214
NM_022023 // Gmfb // glia maturation factor, beta // 14 C1|14 18.0 cM // 63985 /// ENSM	Gmfb	NM_022023	0.00331174	0.123894	0.913858	-1.09426
NM_025287 // Spop // speckle-type POZ protein // 11 D|11 55.6 cM // 20747 /// ENSMUST00	Spop	NM_025287	0.00329624	0.123894	0.862468	-1.15946
NM_025783 // Vps24 // vacuolar protein sorting 24 (yeast) // 6 C3|6 31.5 cM // 66700 //	Vps24	NM_025783	0.00326492	0.123894	1.21532	1.21532
NM_028710 // Arsg // arylsulfatase G // 11 E1|11 // 74008 /// NM_001166177 // Arsg // a	Arsg	NM_028710	0.0032977	0.123894	1.37816	1.37816
NM_133807 // Lrrc59 // leucine rich repeat containing 59 // 11 D|11 // 98238 /// ENSMUS	Lrrc59	NM_133807	0.00331042	0.123894	0.857058	-1.16678
NM_007576 // C4bp // complement component 4 binding protein // 1 E4|1 67.6 cM // 12269	C4bp	NM_007576	0.0033478	0.124107	1.13328	1.13328
NM_011274 // C80913 // expressed sequence C80913 // 7 B2|7 // 19777 /// ENSMUST00000085	C80913	NM_011274	0.00338767	0.124107	1.15928	1.15928
NM_029945 // Smpd4 // sphingomyelin phosphodiesterase 4 // 16|16 B1 // 77626 /// NM_001	Smpd4	NM_029945	0.00338338	0.124107	0.838753	-1.19225
NM_172391 // Ahsa2 // AHA1, activator of heat shock protein ATPase homolog 2 (yeast) //	Ahsa2	NM_172391	0.00338532	0.124107	0.792405	-1.26198
NM_172405 // Fam175a // family with sequence similarity 175, member A // 5 E4|5 // 7068	Fam175a	NM_172405	0.00339123	0.124107	1.19796	1.19796
NM_175668 // Gpr4 // G protein-coupled receptor 4 // 7 A3|7 // 319197 /// ENSMUST000000	Gpr4	NM_175668	0.0033684	0.124107	0.739819	-1.35168
NM_177608 // Secisbp2l // SECIS binding protein 2-like // 2 F1|2 // 70354 /// ENSMUST00	Secisbp2l	NM_177608	0.00335757	0.124107	1.2065	1.2065
NM_001080963 // Ppapdc1a // phosphatidic acid phosphatase type 2 domain containing 1A /	Ppapdc1a	NM_001080963	0.00342157	0.124435	0.736906	-1.35703
NM_009399 // Tnfrsf11a // tumor necrosis factor receptor superfamily, member 11a // 1 E	Tnfrsf11a	NM_009399	0.00341155	0.124435	1.12603	1.12603
NM_013535 // Grcc10 // gene rich cluster, C10 gene // 6 F2|6 60.22 cM // 14790 /// NR_0	Grcc10	NM_013535	0.0034382	0.124435	0.898185	-1.11336
NM_175480 // Zfp612 // zinc finger protein 612 // 8 D3|8 // 234725 /// ENSMUST000000588	Zfp612	NM_175480	0.00341556	0.124435	0.856449	-1.16761
NM_181820 // Tmc4 // transmembrane channel-like gene family 4 // 7 A1|7 // 353499 /// E	Tmc4	NM_181820	0.00344076	0.124435	0.854967	-1.16964
NM_025637 // Rwdd3 // RWD domain containing 3 // 3 G1|3 // 66568 /// NM_028456 // Rwdd3	Rwdd3	NM_025637	0.00346869	0.124931	1.18139	1.18139
NM_008985 // Ptprn // protein tyrosine phosphatase, receptor type, N // 1 C3|1 41.0 cM	Ptprn	NM_008985	0.00348508	0.125276	0.909658	-1.09931
NM_001037713 // Xaf1 // XIAP associated factor 1 // 11 B4|11 // 327959 /// ENSMUST00000	Xaf1	NM_001037713	0.00351124	0.12548	1.34257	1.34257
NM_023061 // Mcam // melanoma cell adhesion molecule // 9 A5.1|9 // 84004 /// ENSMUST00	Mcam	NM_023061	0.00350892	0.12548	1.29863	1.29863
NM_145445 // Eif2b2 // eukaryotic translation initiation factor 2B, subunit 2 beta // 1	Eif2b2	NM_145445	0.00349799	0.12548	0.806377	-1.24011
NM_025574 // Pigy // phosphatidylinositol glycan anchor biosynthesis, class Y // 6 B3|6	Pigy	NM_025574	0.00352242	0.125635	0.86316	-1.15853
NM_011148 // Ppef2 // protein phosphatase, EF hand calcium-binding domain 2 // 5|5 E3 /	Ppef2	NM_011148	0.00353678	0.125659	0.848662	-1.17833
NM_172946 // Krt222 // keratin 222 // 11 D|11 // 268481 /// ENSMUST00000103132 // Krt22	Krt222	NM_172946	0.00353465	0.125659	0.782616	-1.27777
NM_183276 // Nbeal2 // neurobeachin-like 2 // 9 F2|9 // 235627 /// BC157956 // Nbeal2 /	Nbeal2	NM_183276	0.00354412	0.125676	0.884275	-1.13087
NM_026886 // Srrm4 // serine/arginine repetitive matrix 4 // 5 F|5 // 68955 /// ENSMUST	Srrm4	NM_026886	0.00356328	0.126112	0.741551	-1.34853
NM_001159551 // H13 // histocompatibility 13 // 2 H1|2 86.0 cM // 14950 /// NM_010376 /	H13	NM_001159551	0.00357038	0.126121	0.872267	-1.14644
NM_017383 // Cntn6 // contactin 6 // 6|6 E2 // 53870 /// ENSMUST00000089215 // Cntn6 //	Cntn6	NM_017383	0.00360477	0.126898	0.847293	-1.18023
NM_026829 // Mthfs // 5, 10-methenyltetrahydrofolate synthetase // 9 E3.1|9 // 107885 /	Mthfs	NM_026829	0.00361311	0.126898	1.13989	1.13989
NM_134118 // Tecr // trans-2,3-enoyl-CoA reductase // 8 C3|8 43.5 cM // 106529 /// NM_0	Tecr	NM_134118	0.00361063	0.126898	0.917271	-1.09019
NM_016908 // Syt5 // synaptotagmin V // 7 A1|7 // 53420 /// ENSMUST00000065957 // Syt5	Syt5	NM_016908	0.00364459	0.127162	0.862634	-1.15924
NM_080458 // Bsnd // Bartter syndrome, infantile, with sensorineural deafness (Barttin)	Bsnd	NM_080458	0.00363054	0.127162	1.1123	1.1123
NM_172726 // E130309D02Rik // RIKEN cDNA E130309D02 gene // 5 G2|5 // 231868 /// ENSMUS	E130309D02Rik	NM_172726	0.00364193	0.127162	0.863243	-1.15842
NM_178404 // Zc3h6 // zinc finger CCCH type containing 6 // 2 F1|2 // 78751 /// ENSMUST	Zc3h6	NM_178404	0.00364833	0.127162	1.20141	1.20141
NM_053261 // Impa2 // inositol (myo)-1(or 4)-monophosphatase 2 // 18 E1|18 // 114663 //	Impa2	NM_053261	0.00365726	0.127232	1.17528	1.17528
NM_001002895 // AI413582 // expressed sequence AI413582 // 17 A3.3|17 // 106672 /// ENS	AI413582	NM_001002895	0.00376064	0.127344	1.10073	1.10073
NM_001101431 // 2510049J12Rik // RIKEN cDNA 2510049J12 gene // 6 E3|6 // 70291	2510049J12Rik	NM_001101431	0.00370754	0.127344	1.23556	1.23556
NM_001128601 // Gm2382 // predicted gene 2382 // 9 E3.1|9 // 100039707 /// NM_026829 //	Gm2382	NM_001128601	0.00373141	0.127344	1.13246	1.13246
NM_007614 // Ctnnb1 // catenin (cadherin associated protein), beta 1 // 9 F4|9 72.0 cM	Ctnnb1	NM_007614	0.00377746	0.127344	0.922965	-1.08346
NM_008029 // Flt4 // FMS-like tyrosine kinase 4 // 11 A5-B1|11 25.0 cM // 14257 /// ENS	Flt4	NM_008029	0.00375922	0.127344	1.10731	1.10731
NM_009154 // Sema5a // sema domain, seven thrombospondin repeats (type 1 and type 1-lik	Sema5a	NM_009154	0.0036829	0.127344	0.641946	-1.55776
NM_009177 // St3gal1 // ST3 beta-galactoside alpha-2,3-sialyltransferase 1 // 15 D2|15	St3gal1	NM_009177	0.00368997	0.127344	0.576665	-1.73411
NM_010476 // Hsd17b7 // hydroxysteroid (17-beta) dehydrogenase 7 // 1 H3|1 // 15490 ///	Hsd17b7	NM_010476	0.00376466	0.127344	0.821149	-1.21781
NM_011956 // Nubp2 // nucleotide binding protein 2 // 17 A3.3|17 10.0 cM // 26426 /// E	Nubp2	NM_011956	0.00376543	0.127344	0.891714	-1.12144
NM_020050 // Tmem9b // TMEM9 domain family, member B // 7 E3|7 // 56786 /// ENSMUST0000	Tmem9b	NM_020050	0.00370194	0.127344	0.920487	-1.08638
NM_023695 // Crybb1 // crystallin, beta B1 // 5 F|5 59.0 cM // 12960 /// ENSMUST0000003	Crybb1	NM_023695	0.00376399	0.127344	0.803893	-1.24395
NM_027948 // 1700003E16Rik // RIKEN cDNA 1700003E16 gene // 6 C3|6 // 71837 /// BC12694	1700003E16Rik	NM_027948	0.00374268	0.127344	0.826813	-1.20946
NM_029662 // Mfsd2a // major facilitator superfamily domain containing 2A // 4|4 D1 //	Mfsd2a	NM_029662	0.00369262	0.127344	0.668047	-1.4969
NM_029682 // Stambpl1 // STAM binding protein like 1 // 19 C1|19 // 76630 /// ENSMUST00	Stambpl1	NM_029682	0.00369904	0.127344	0.818618	-1.22157
NM_052994 // Spock2 // sparc/osteonectin, cwcv and kazal-like domains proteoglycan 2 //	Spock2	NM_052994	0.00377834	0.127344	0.887059	-1.12732
NM_178738 // Prss35 // protease, serine, 35 // 9 E3.1|9 // 244954 /// ENSMUST0000003642	Prss35	NM_178738	0.00377318	0.127344	0.798384	-1.25253
NM_183148 // Iffo2 // intermediate filament family orphan 2 // 4 D3|4 // 212632 /// ENS	Iffo2	NM_183148	0.00376788	0.127344	0.86261	-1.15927
ENSMUST00000160236 // Spef2 // sperm flagellar 2 // 15 A1|15 // 320277 /// ENSMUST00000	Spef2	ENSMUST00000160236	0.00379205	0.127437	1.36814	1.36814
NM_001011851 // Olfr412 // olfactory receptor 412 // 11 B5|11 // 258153 /// ENSMUST0000	Olfr412	NM_001011851	0.00379496	0.127437	1.22215	1.22215
NM_029861 // Cnrip1 // cannabinoid receptor interacting protein 1 // 11|11 A3.1 // 3806	Cnrip1	NM_029861	0.00380437	0.12752	0.750062	-1.33322
NM_025894 // Psmd12 // proteasome (prosome, macropain) 26S subunit, non-ATPase, 12 // 1	Psmd12	NM_025894	0.0038191	0.127548	0.880674	-1.13549
NM_178915 // Tmem179 // transmembrane protein 179 // 12 F1|12 // 104885 /// ENSMUST0000	Tmem179	NM_178915	0.00381799	0.127548	0.865114	-1.15592
ENSMUST00000016088 // Gatsl2 // GATS protein-like 2 // 5|5 G1 // 80909 /// BC026208 //	Gatsl2	ENSMUST00000016088	0.0039723	0.127823	0.785497	-1.27308
ENSMUST00000120239 // Sirt1 // sirtuin 1 (silent mating type information regulation 2,	Sirt1	ENSMUST00000120239	0.00398043	0.127823	1.21831	1.21831
NM_001004173 // Sgpp2 // sphingosine-1-phosphate phosphotase 2 // 1 C4|1 // 433323 ///	Sgpp2	NM_001004173	0.00391891	0.127823	1.29608	1.29608
NM_001033638 // Crxos1 // Crx opposite strand transcript 1 // 7 A1|7 // 546024 /// ENSM	Crxos1	NM_001033638	0.00393689	0.127823	1.1331	1.1331
NM_001081008 // Taf1 // TAF1 RNA polymerase II, TATA box binding protein (TBP)-associat	Taf1	NM_001081008	0.00394275	0.127823	0.922706	-1.08377
NM_001164594 // Pdzrn4 // PDZ domain containing RING finger 4 // 15 E3|15 // 239618 ///	Pdzrn4	NM_001164594	0.00384361	0.127823	0.677649	-1.47569
NM_008125 // Gjb2 // gap junction protein, beta 2 // 14 D1-E1|14 21.0 cM // 14619 /// E	Gjb2	NM_008125	0.00390029	0.127823	0.654826	-1.52712
NM_008144 // Bscl2 // Bernardinelli-Seip congenital lipodystrophy 2 homolog (human) //	Bscl2	NM_008144	0.00396408	0.127823	0.837762	-1.19366
NM_008338 // Ifngr2 // interferon gamma receptor 2 // 16 C3.3|16 63.3 cM // 15980 /// E	Ifngr2	NM_008338	0.00391925	0.127823	0.800231	-1.24964
NM_011267 // Rgs16 // regulator of G-protein signaling 16 // 1 G3|1 78.0 cM // 19734 //	Rgs16	NM_011267	0.00396047	0.127823	0.814764	-1.22735
NM_011670 // Uchl1 // ubiquitin carboxy-terminal hydrolase L1 // 5 C3.1|5 36.0 cM // 22	Uchl1	NM_011670	0.00385419	0.127823	0.83229	-1.2015
NM_020588 // Tmem183a // transmembrane protein 183A // 1 E4|1 // 57439 /// NM_001042485	Tmem183a	NM_020588	0.0039773	0.127823	0.901385	-1.1094
NM_021338 // Rpl35a // ribosomal protein L35A // 16 B3|16 // 57808 /// NM_001130485 //	Rpl35a	NM_021338	0.00392968	0.127823	1.12693	1.12693
NM_023626 // Ing3 // inhibitor of growth family, member 3 // 6|6 A3 // 71777 /// ENSMUS	Ing3	NM_023626	0.00387604	0.127823	0.864187	-1.15716
NM_024262 // 1200011M11Rik // RIKEN cDNA 1200011M11 gene // 11 C|11 // 74133 /// ENSMUS	1200011M11Rik	NM_024262	0.00391381	0.127823	0.863956	-1.15747
NM_025483 // Senp7 // SUMO1/sentrin specific peptidase 7 // 16 C1.1|16 // 66315 /// NM_	Senp7	NM_025483	0.00396515	0.127823	1.09121	1.09121
NM_030127 // Htra3 // HtrA serine peptidase 3 // 5|5 B1 // 78558 /// NM_001042615 // Ht	Htra3	NM_030127	0.00389587	0.127823	0.915372	-1.09245
NM_053249 // Krt82 // keratin 82 // 15 F2|15 58.75 cM // 114566 /// ENSMUST00000023713	Krt82	NM_053249	0.00394973	0.127823	1.13937	1.13937
NM_144921 // Atp1a3 // ATPase, Na+/K+ transporting, alpha 3 polypeptide // 7 A3|7 5.5 c	Atp1a3	NM_144921	0.00391192	0.127823	0.911947	-1.09655
NM_145462 // Haus4 // HAUS augmin-like complex, subunit 4 // 14 C3|14 20.0 cM // 219072	Haus4	NM_145462	0.00397029	0.127823	1.14812	1.14812
NM_153116 // Gtpbp10 // GTP-binding protein 10 (putative) // 5 A1|5 // 207704 /// BC034	Gtpbp10	NM_153116	0.00390304	0.127823	1.16813	1.16813
BC092045 // Tpm3 // tropomyosin 3, gamma // 3 F1|3 // 59069 /// ENSMUST00000029549 // T	Tpm3	BC092045	0.00403853	0.127878	0.870861	-1.14829
NM_001083342 // Ptchd2 // patched domain containing 2 // 4 E2|4 // 242748 /// ENSMUST00	Ptchd2	NM_001083342	0.00403526	0.127878	0.864369	-1.15691
NM_009938 // Copa // coatomer protein complex subunit alpha // 1 H3|1 93.5 cM // 12847	Copa	NM_009938	0.00405174	0.127878	0.923118	-1.08328
NM_015820 // Hs6st3 // heparan sulfate 6-O-sulfotransferase 3 // 14 E4|14 // 50787 ///	Hs6st3	NM_015820	0.00399862	0.127878	1.27041	1.27041
NM_019419 // Arl6ip1 // ADP-ribosylation factor-like 6 interacting protein 1 // 7|7 F3	Arl6ip1	NM_019419	0.00402837	0.127878	0.894237	-1.11827
NM_026464 // Wdr55 // WD repeat domain 55 // 18 B2|18 // 67936 /// NM_173383 // Dnd1 //	Wdr55	NM_026464	0.00403997	0.127878	1.12574	1.12574
NM_028354 // Tdp1 // tyrosyl-DNA phosphodiesterase 1 // 12 E|12 // 104884 /// ENSMUST00	Tdp1	NM_028354	0.00399645	0.127878	0.858408	-1.16495
NM_031402 // Crispld1 // cysteine-rich secretory protein LCCL domain containing 1 // 1	Crispld1	NM_031402	0.00404618	0.127878	1.17581	1.17581
NM_145540 // Ints3 // integrator complex subunit 3 // 3 F1|3 // 229543 /// NM_178876 //	Ints3	NM_145540	0.00401254	0.127878	0.856439	-1.16763
NM_146243 // Actr2 // ARP2 actin-related protein 2 homolog (yeast) // 11 A3.1|11 31.5 c	Actr2	NM_146243	0.00403129	0.127878	1.0849	1.0849
NM_033270 // E2f6 // E2F transcription factor 6 // 12 A1.1|12 6.0 cM // 50496 /// NR_02	E2f6	NM_033270	0.00406373	0.128036	0.89011	-1.12346
NM_177879 // Sdk1 // sidekick homolog 1 (chicken) // 5 G2|5 // 330222 /// ENSMUST000000	Sdk1	NM_177879	0.00407654	0.12822	0.83337	-1.19995
NM_010791 // Meox1 // mesenchyme homeobox 1 // 11 D|11 58.0 cM // 17285 /// ENSMUST0000	Meox1	NM_010791	0.00408695	0.128327	1.1266	1.1266
NM_009033 // Rbmxrt // RNA binding motif protein, X chromosome retrogene // 8 C1|8 // 1	Rbmxrt	NM_009033	0.00409821	0.128461	0.899726	-1.11145
XR_106736 // Gm2695 // predicted gene 2695 // 12 E|12 // 100040297	Gm2695	XR_106736	0.00411275	0.128697	1.12754	1.12754
NM_010479 // Hspa1a // heat shock protein 1A // 17 B1|17 18.95 cM // 193740 /// NM_0104	Hspa1a	NM_010479	0.00412762	0.128943	0.758381	-1.3186
ENSMUST00000100552 // Gm10876 // predicted gene 10876 // --- // 100038376	Gm10876	ENSMUST00000100552	0.0041544	0.129268	1.15445	1.15445
NM_021500 // Maea // macrophage erythroblast attacher // 5 B1|5 // 59003 /// ENSMUST000	Maea	NM_021500	0.00415913	0.129268	0.879181	-1.13742
NM_025311 // D14Ertd449e // DNA segment, Chr 14, ERATO Doi 449, expressed // 14 6.0 cM	D14Ertd449e	NM_025311	0.00415121	0.129268	1.23464	1.23464
NM_029839 // Trub1 // TruB pseudouridine (psi) synthase homolog 1 (E. coli) // 19 D2|19	Trub1	NM_029839	0.00417099	0.129379	1.11022	1.11022
NM_030727 // Slc26a5 // solute carrier family 26, member 5 // 5 A3|5 8.0 cM // 80979 //	Slc26a5	NM_030727	0.00419089	0.129379	1.30061	1.30061
NM_183285 // Kctd2 // potassium channel tetramerisation domain containing 2 // 11 E2|11	Kctd2	NM_183285	0.00418356	0.129379	0.818765	-1.22135
XM_003086700 // LOC100505227 // hypothetical protein LOC100505227 // --- // 100505227	LOC100505227	XM_003086700	0.00418664	0.129379	1.16992	1.16992
NM_030116 // Mrpl9 // mitochondrial ribosomal protein L9 // 3|3 F2 // 78523 /// ENSMUST	Mrpl9	NM_030116	0.00422168	0.129618	0.844371	-1.18431
NM_175639 // Wdr43 // WD repeat domain 43 // 17 E1.3|17 // 72515 /// ENSMUST00000047086	Wdr43	NM_175639	0.00422684	0.129618	1.08398	1.08398
NM_199465 // Nexn // nexilin // 3 H3|3 // 68810 /// ENSMUST00000046045 // Nexn // nexil	Nexn	NM_199465	0.0042238	0.129618	1.83158	1.83158
BC057057 // Cdk12 // cyclin-dependent kinase 12 // 11 D|11 56.0 cM // 69131	Cdk12	BC057057	0.00425949	0.130129	1.22779	1.22779
NM_001099307 // Gm7173 // predicted gene 7173 // X B|X // 636104	Gm7173	NM_001099307	0.0042546	0.130129	1.27976	1.27976
NM_023547 // Ino80b // INO80 complex subunit B // 6|6 D1 // 70020 /// ENSMUST0000011393	Ino80b	NM_023547	0.00426476	0.130129	1.08919	1.08919
ENSMUST00000056274 // C230013L11Rik // RIKEN cDNA C230013L11 gene // 17 A3.3|17 // 3197	C230013L11Rik	ENSMUST00000056274	0.004301	0.130776	0.868257	-1.15173
NM_024472 // Gltpd1 // glycolipid transfer protein domain containing 1 // 4 E2|4 83.0 c	Gltpd1	NM_024472	0.00430732	0.130776	0.850775	-1.1754
NM_008002 // Fgf10 // fibroblast growth factor 10 // 13 A3-A4|13 75.0 cM // 14165 /// E	Fgf10	NM_008002	0.00431738	0.130785	0.702512	-1.42346
NM_178802 // Trim65 // tripartite motif-containing 65 // 11 E2|11 // 338364 /// ENSMUST	Trim65	NM_178802	0.00432186	0.130785	0.882602	-1.13301
NM_183171 // Fez1 // fasciculation and elongation protein zeta 1 (zygin I) // 9 A4|9 //	Fez1	NM_183171	0.00433094	0.130844	1.10127	1.10127
NM_001164528 // Ildr2 // immunoglobulin-like domain containing receptor 2 // 1 H2.3|1 8	Ildr2	NM_001164528	0.0043506	0.131222	0.610919	-1.63688
NM_001122818 // Pnpla6 // patatin-like phospholipase domain containing 6 // 8 A1.1|8 1.	Pnpla6	NM_001122818	0.00438211	0.131525	0.864431	-1.15683
NM_033476 // Tcfcp2 // transcription factor CP2 // 15 F1|15 56.8 cM // 21422 /// ENSMUS	Tcfcp2	NM_033476	0.00436843	0.131525	0.90883	-1.10032
NM_153154 // Tcfap2d // transcription factor AP-2, delta // 1 A3|1 // 226896 /// ENSMUS	Tcfap2d	NM_153154	0.00437773	0.131525	0.737	-1.35685
NM_007937 // Epha5 // Eph receptor A5 // 5 E1|5 43.0 cM // 13839 /// ENSMUST00000053733	Epha5	NM_007937	0.00442668	0.131858	0.65939	-1.51655
NM_008846 // Pip5k1b // phosphatidylinositol-4-phosphate 5-kinase, type 1 beta // 19|19	Pip5k1b	NM_008846	0.00442181	0.131858	0.649202	-1.54035
NM_016867 // Gipc2 // GIPC PDZ domain containing family, member 2 // 3 H3|3 // 54120 //	Gipc2	NM_016867	0.00441172	0.131858	1.30796	1.30796
NM_027994 // Cand1 // cullin associated and neddylation disassociated 1 // 10 D2|10 63.	Cand1	NM_027994	0.00443628	0.131858	0.904013	-1.10618
NM_028941 // 4933407C03Rik // RIKEN cDNA 4933407C03 gene // 8 E1|8 // 74440 /// NM_0011	4933407C03Rik	NM_028941	0.00443201	0.131858	0.81941	-1.22039
NM_029519 // Rap2a // RAS related protein 2a // 14 E4|14 59.0 cM // 76108 /// ENSMUST00	Rap2a	NM_029519	0.0044141	0.131858	0.810077	-1.23445
NM_001168304 // Cdk19 // cyclin-dependent kinase 19 // 10 B1|10 // 78334 /// NM_198164	Cdk19	NM_001168304	0.00447776	0.132876	1.22366	1.22366
NM_009097 // Rps6ka1 // ribosomal protein S6 kinase polypeptide 1 // 4 D3|4 // 20111 //	Rps6ka1	NM_009097	0.00449338	0.133124	1.16578	1.16578
NM_026021 // Zmynd19 // zinc finger, MYND domain containing 19 // 2 A3|2 // 67187 /// E	Zmynd19	NM_026021	0.00450256	0.133181	0.908167	-1.10112
NM_001111015 // Syn2 // synapsin II // 6 F|6 50.3 cM // 20965 /// NM_013681 // Syn2 //	Syn2	NM_001111015	0.00452486	0.133422	0.823632	-1.21413
NM_001163145 // 1810041L15Rik // RIKEN cDNA 1810041L15 gene // 15 E2|15 // 72301 /// EN	1810041L15Rik	NM_001163145	0.00453306	0.133422	0.661383	-1.51198
NM_008831 // Phb // prohibitin // 11 D|11 55.6 cM // 18673 /// ENSMUST00000125172 // Ph	Phb	NM_008831	0.00453899	0.133422	0.874696	-1.14325
NM_013745 // Nufip1 // nuclear fragile X mental retardation protein interacting protein	Nufip1	NM_013745	0.00456155	0.133422	0.888721	-1.12521
NM_030678 // Gys1 // glycogen synthase 1, muscle // 7 B4|7 23.0 cM // 14936 /// ENSMUST	Gys1	NM_030678	0.00454779	0.133422	0.84652	-1.18131
NM_030687 // Slco1a4 // solute carrier organic anion transporter family, member 1a4 //	Slco1a4	NM_030687	0.00456115	0.133422	1.21516	1.21516
NR_004857 // LOC100134990 // selenoprotein K pseudogene // 11 A3.3|11 // 100134990	LOC100134990	NR_004857	0.00455021	0.133422	1.16485	1.16485
NM_177362 // Zfp771 // zinc finger protein 771 // 7 F3|7 // 244216 /// ENSMUST000000525	Zfp771	NM_177362	0.00458281	0.133831	0.898159	-1.11339
NM_183017 // Ttll12 // tubulin tyrosine ligase-like family, member 12 // 15 E1|15 // 22	Ttll12	NM_183017	0.0045908	0.133851	0.811084	-1.23292
NM_013703 // Vldlr // very low density lipoprotein receptor // 19 C1|19 20.0 cM // 2235	Vldlr	NM_013703	0.00461126	0.134022	1.1214	1.1214
NM_172383 // Tmem125 // transmembrane protein 125 // 4 D2.1|4 // 230678 /// BC039806 //	Tmem125	NM_172383	0.00460895	0.134022	1.16611	1.16611
NM_009955 // Dpysl2 // dihydropyrimidinase-like 2 // 14 D1|14 28.2 cM // 12934 /// ENSM	Dpysl2	NM_009955	0.00461857	0.134023	0.898162	-1.11338
NM_001007577 // Tceanc // transcription elongation factor A (SII) N-terminal and centra	Tceanc	NM_001007577	0.00472334	0.134706	1.18023	1.18023
NM_001167750 // Ccdc132 // coiled-coil domain containing 132 // 6 A1|6 // 73288 /// NM_	Ccdc132	NM_001167750	0.00467438	0.134706	1.10505	1.10505
NM_008972 // Ptma // prothymosin alpha // 1 D|1 // 19231 /// ENSMUST00000045897 // Ptma	Ptma	NM_008972	0.00469342	0.134706	1.14996	1.14996
NM_010388 // H2-DMb2 // histocompatibility 2, class II, locus Mb2 // 17 B1|17 18.57 cM	H2-DMb2	NM_010388	0.00473012	0.134706	1.20356	1.20356
NM_010930 // Nov // nephroblastoma overexpressed gene // 15 D1|15 22.5 cM // 18133 ///	Nov	NM_010930	0.00471421	0.134706	0.376171	-2.65837
NM_023764 // Tollip // toll interacting protein // 7 F5|7 // 54473 /// ENSMUST000000019	Tollip	NM_023764	0.00471773	0.134706	0.864836	-1.15629
NM_028835 // Atg7 // autophagy-related 7 (yeast) // 6 E3|6 // 74244 /// ENSMUST00000032	Atg7	NM_028835	0.00469638	0.134706	0.857482	-1.1662
NM_134029 // Nt5m // 5',3'-nucleotidase, mitochondrial // 11|11 B // 103850 /// ENSMUST	Nt5m	NM_134029	0.00469711	0.134706	0.851326	-1.17464
NM_172300 // Ube2z // ubiquitin-conjugating enzyme E2Z (putative) // 11 D|11 55.8 cM //	Ube2z	NM_172300	0.00465827	0.134706	0.866155	-1.15453
NM_177045 // Cc2d1b // coiled-coil and C2 domain containing 1B // 4 C7|4 // 319965 ///	Cc2d1b	NM_177045	0.00471212	0.134706	1.15399	1.15399
NR_002840 // Gas5 // growth arrest specific 5 // 1 H2.1|1 // 14455 /// X59728 // Gas5 /	Gas5	NR_002840	0.00472805	0.134706	1.16733	1.16733
XM_003086580 // LOC100503763 // cytochrome c, somatic-like // --- // 100503763	LOC100503763	XM_003086580	0.00469753	0.134706	1.17145	1.17145
NM_019454 // Dll4 // delta-like 4 (Drosophila) // 2|2 E3 // 54485 /// ENSMUST0000010251	Dll4	NM_019454	0.00474995	0.135062	1.15149	1.15149
ENSMUST00000097954 // Gm10577 // predicted gene 10577 // --- // 100038687	Gm10577	ENSMUST00000097954	0.00477736	0.135102	1.18877	1.18877
ENSMUST00000098854 // Gm10687 // predicted gene 10687 // --- // 100038560	Gm10687	ENSMUST00000098854	0.00480766	0.135102	1.21082	1.21082
NM_001025360 // Klc1 // kinesin light chain 1 // 12 F1|12 57.0 cM // 16593 /// NM_00108	Klc1	NM_001025360	0.00479301	0.135102	0.901654	-1.10907
NM_009214 // Sms // spermine synthase // X F4|X 65.45 cM // 20603 /// NR_004433 // Gm82	Sms	NM_009214	0.00481219	0.135102	0.903739	-1.10651
NM_009228 // Snta1 // syntrophin, acidic 1 // 2 H1|2 84.0 cM // 20648 /// ENSMUST000001	Snta1	NM_009228	0.00482492	0.135102	0.844169	-1.1846
NM_010297 // Glra4 // glycine receptor, alpha 4 subunit // X F1|X 56.0 cM // 14657 ///	Glra4	NM_010297	0.0048186	0.135102	0.856274	-1.16785
NM_031842 // Smarcd1 // SWI/SNF related, matrix associated, actin dependent regulator o	Smarcd1	NM_031842	0.00481423	0.135102	1.14236	1.14236
NM_134150 // Otub1 // OTU domain, ubiquitin aldehyde binding 1 // 19 A|19 // 107260 ///	Otub1	NM_134150	0.00480579	0.135102	0.873748	-1.14449
NM_183408 // Pde4a // phosphodiesterase 4A, cAMP specific // 9 A3|9 8.0 cM // 18577 ///	Pde4a	NM_183408	0.00481828	0.135102	0.829235	-1.20593
XM_994395 // Gm4990 // predicted gene 4990 // X C3|X // 245516	Gm4990	XM_994395	0.00477274	0.135102	1.17452	1.17452
NM_139305 // Car9 // carbonic anhydrase 9 // 4 B1|4 // 230099 /// ENSMUST00000030183 //	Car9	NM_139305	0.00484146	0.135359	1.139	1.139
NM_007669 // Cdkn1a // cyclin-dependent kinase inhibitor 1A (P21) // 17 A3.3|17 15.23 c	Cdkn1a	NM_007669	0.00488059	0.135487	0.579891	-1.72446
NM_011671 // Ucp2 // uncoupling protein 2 (mitochondrial, proton carrier) // 7 E3|7 50.	Ucp2	NM_011671	0.00488292	0.135487	0.753286	-1.32752
NM_025448 // Ssr2 // signal sequence receptor, beta // 3 F1|3 // 66256 /// ENSMUST00000	Ssr2	NM_025448	0.0048604	0.135487	0.896697	-1.1152
NM_177167 // Ppm1e // protein phosphatase 1E (PP2C domain containing) // 11 C|11 // 320	Ppm1e	NM_177167	0.00487895	0.135487	0.599188	-1.66893
NM_145954 // Aldh16a1 // aldehyde dehydrogenase 16 family, member A1 // 7 B4|7 // 69748	Aldh16a1	NM_145954	0.00489109	0.135509	1.08126	1.08126
NM_172272 // Pars2 // prolyl-tRNA synthetase (mitochondrial)(putative) // 4 C7|4 // 230	Pars2	NM_172272	0.00494701	0.136441	1.17752	1.17752
NM_178667 // Tfdp2 // transcription factor Dp 2 // 9 E3.3|9 // 211586 /// NM_001184706	Tfdp2	NM_178667	0.0049429	0.136441	1.2008	1.2008
NM_009129 // Scg2 // secretogranin II // 1 C4|1 43.6 cM // 20254 /// ENSMUST00000049972	Scg2	NM_009129	0.00497176	0.136839	0.765254	-1.30676
NM_145834 // Il17c // interleukin 17C // 8 E1|8 // 234836 /// ENSMUST00000050963 // Il1	Il17c	NM_145834	0.0049856	0.136888	1.13413	1.13413
NM_025716 // Spryd4 // SPRY domain containing 4 // 10 D3|10 // 66701 /// ENSMUST0000006	Spryd4	NM_025716	0.00500155	0.137121	0.832318	-1.20146
NM_175224 // Metap1 // methionyl aminopeptidase 1 // 3 G3|3 // 75624 /// ENSMUST0000002	Metap1	NM_175224	0.00501692	0.137338	0.847425	-1.18005
AK047216 // B930036N10Rik // RIKEN cDNA B930036N10 gene // 1 H3|1 // 100048917 /// AK17	B930036N10Rik	AK047216	0.00505976	0.137467	1.30553	1.30553
NM_009067 // Ralbp1 // ralA binding protein 1 // 17 E1.1|17 38.0 cM // 19765 /// ENSMUS	Ralbp1	NM_009067	0.00506266	0.137467	0.917357	-1.09009
NM_011299 // Rps6ka2 // ribosomal protein S6 kinase, polypeptide 2 // 17 F4|17 3.65 cM	Rps6ka2	NM_011299	0.00504804	0.137467	0.802593	-1.24596
NM_133800 // Nol12 // nucleolar protein 12 // 15 E1|15 // 97961 /// ENSMUST00000138880	Nol12	NM_133800	0.00504089	0.137467	1.13056	1.13056
NM_175140 // Chst8 // carbohydrate (N-acetylgalactosamine 4-0) sulfotransferase 8 // 7|	Chst8	NM_175140	0.00506654	0.137467	0.769558	-1.29945
NM_175331 // Nt5dc3 // 5'-nucleotidase domain containing 3 // 10 C1|10 // 103466 /// EN	Nt5dc3	NM_175331	0.005047	0.137467	0.729181	-1.3714
NM_021511 // Rrs1 // RRS1 ribosome biogenesis regulator homolog (S. cerevisiae) // 1 A2	Rrs1	NM_021511	0.00509709	0.137889	1.27752	1.27752
NM_177388 // Slc41a2 // solute carrier family 41, member 2 // 10 C1|10 // 338365 /// EN	Slc41a2	NM_177388	0.00509041	0.137889	0.814847	-1.22722
NM_028475 // Ubap2l // ubiquitin associated protein 2-like // 3 F2|3 // 74383 /// NM_00	Ubap2l	NM_028475	0.00515942	0.138919	0.932148	-1.07279
NM_029815 // Bcas1 // breast carcinoma amplified sequence 1 // 2 H3|2 // 76960 /// NM_0	Bcas1	NM_029815	0.00515669	0.138919	1.30253	1.30253
NM_145939 // Alg3 // asparagine-linked glycosylation 3 homolog (yeast, alpha-1,3-mannos	Alg3	NM_145939	0.00516543	0.138919	0.86989	-1.14957
NM_177869 // Fam185a // family with sequence similarity 185, member A // 5 A3|5 // 3300	Fam185a	NM_177869	0.00514418	0.138919	0.877828	-1.13917
BC048645 // 1700019D03Rik // RIKEN cDNA 1700019D03 gene // 1 C1.1|1 // 67080 /// NM_144	1700019D03Rik	BC048645	0.00518625	0.138985	0.768297	-1.30158
ENSMUST00000102975 // Mobkl2b // MOB1, Mps One Binder kinase activator-like 2B (yeast)	Mobkl2b	ENSMUST00000102975	0.00526442	0.138985	1.41778	1.41778
NM_001024922 // Ddx49 // DEAD (Asp-Glu-Ala-Asp) box polypeptide 49 // 8 B3.3|8 // 23437	Ddx49	NM_001024922	0.00528476	0.138985	0.870265	-1.14908
NM_001024952 // Rc3h1 // RING CCCH (C3H) domains 1 // 1 H2.1|1 // 381305 /// ENSMUST000	Rc3h1	NM_001024952	0.00528	0.138985	0.900209	-1.11085
NM_009612 // Acvrl1 // activin A receptor, type II-like 1 // 15|15 F3 // 11482 /// ENSM	Acvrl1	NM_009612	0.00526136	0.138985	1.23735	1.23735
NM_011632 // Traf3 // TNF receptor-associated factor 3 // 12 F|12 55.0 cM // 22031 ///	Traf3	NM_011632	0.00528897	0.138985	0.865129	-1.1559
NM_013716 // G3bp1 // Ras-GTPase-activating protein SH3-domain binding protein 1 // 11	G3bp1	NM_013716	0.00519481	0.138985	0.852611	-1.17287
NM_025285 // Stmn2 // stathmin-like 2 // 3 A1|3 6.6 cM // 20257 /// ENSMUST00000116348	Stmn2	NM_025285	0.00522824	0.138985	0.726303	-1.37684
NM_025846 // Rras2 // related RAS viral (r-ras) oncogene homolog 2 // 7 F2|7 // 66922 /	Rras2	NM_025846	0.00526705	0.138985	0.723337	-1.38248
NM_026434 // Rbm18 // RNA binding motif protein 18 // 2 B|2 // 67889 /// NR_027515 // R	Rbm18	NM_026434	0.00522918	0.138985	0.901789	-1.10891
NM_144796 // Susd4 // sushi domain containing 4 // 1 H5|1 // 96935 /// ENSMUST000000857	Susd4	NM_144796	0.00523514	0.138985	0.86252	-1.15939
NM_146248 // Cchcr1 // coiled-coil alpha-helical rod protein 1 // 17 B1|17 // 240084 //	Cchcr1	NM_146248	0.00524449	0.138985	1.12859	1.12859
NM_173742 // Rnasek // ribonuclease, RNase K // 11 B3|11 37.0 cM // 52898 /// ENSMUST00	Rnasek	NM_173742	0.0052576	0.138985	0.847102	-1.18049
NM_175678 // Npsr1 // neuropeptide S receptor 1 // 9 A3-A4|9 // 319239 /// ENSMUST00000	Npsr1	NM_175678	0.00522889	0.138985	0.552863	-1.80876
NM_177710 // Ssh2 // slingshot homolog 2 (Drosophila) // 11 B5|11 // 237860 /// ENSMUST	Ssh2	NM_177710	0.00524747	0.138985	0.881986	-1.1338
NM_178061 // Mobkl2b // MOB1, Mps One Binder kinase activator-like 2B (yeast) // 4 A5|4	Mobkl2b	NM_178061	0.00522731	0.138985	1.29284	1.29284
NM_012050 // Omd // osteomodulin // 13 A5|13 // 27047 /// ENSMUST00000065494 // Omd //	Omd	NM_012050	0.00531352	0.139431	0.840056	-1.1904
ENSMUST00000031985 // Mkrn1 // makorin, ring finger protein, 1 // 6 B1|6 // 54484	Mkrn1	ENSMUST00000031985	0.00538434	0.139693	1.09587	1.09587
ENSMUST00000059598 // Gm9776 // predicted gene 9776 // 13 D1|13 // 328309	Gm9776	ENSMUST00000059598	0.00536334	0.139693	1.22204	1.22204
ENSMUST00000098592 // Gm10643 // predicted gene 10643 // --- // 100038416	Gm10643	ENSMUST00000098592	0.00537075	0.139693	1.19591	1.19591
NM_001081153 // Unc13c // unc-13 homolog C (C. elegans) // 9 D|9 42.0 cM // 208898 ///	Unc13c	NM_001081153	0.00534018	0.139693	1.3094	1.3094
NM_011869 // Med24 // mediator complex subunit 24 // 11 D|11 56.5 cM // 23989 /// ENSMU	Med24	NM_011869	0.00534674	0.139693	0.852623	-1.17285
NM_025313 // Atp5d // ATP synthase, H+ transporting, mitochondrial F1 complex, delta su	Atp5d	NM_025313	0.00537713	0.139693	0.922641	-1.08385
NM_145760 // Arfgap1 // ADP-ribosylation factor GTPase activating protein 1 // 2 H4|2 1	Arfgap1	NM_145760	0.00535992	0.139693	0.904691	-1.10535
NM_175632 // Oscar // osteoclast associated receptor // 7 A1|7 // 232790 /// AF391159 /	Oscar	NM_175632	0.00536855	0.139693	0.883548	-1.1318
NM_001005342 // Ypel4 // yippee-like 4 (Drosophila) // 2 D|2 // 241525 /// ENSMUST00000	Ypel4	NM_001005342	0.00544015	0.140348	0.77094	-1.29712
NM_001080940 // Gm6484 // predicted gene 6484 // 9 A3|9 // 624219 /// ENSMUST0000005877	Gm6484	NM_001080940	0.0054248	0.140348	1.09846	1.09846
NM_027192 // Ttl // tubulin tyrosine ligase // 2|2 F3 // 69737 /// ENSMUST00000035812 /	Ttl	NM_027192	0.00542573	0.140348	1.16809	1.16809
NM_031165 // Hspa8 // heat shock protein 8 // 9 A5.1|9 24.0 cM // 15481 /// ENSMUST0000	Hspa8	NM_031165	0.0054331	0.140348	0.920098	-1.08684
NM_001081040 // Coq10a // coenzyme Q10 homolog A (yeast) // 10 D3|10 // 210582 /// ENSM	Coq10a	NM_001081040	0.0054617	0.140706	0.820068	-1.21941
NM_029979 // Trim35 // tripartite motif-containing 35 // 14 D1|14 // 66854 /// AF145374	Trim35	NM_029979	0.00547302	0.1408	0.847272	-1.18026
NM_011737 // Ysk4 // Yeast Sps1/Ste20-related kinase 4 (S. cerevisiae) // 1 E3|1 // 226	Ysk4	NM_011737	0.00549518	0.140998	0.724403	-1.38045
NM_053179 // Nans // N-acetylneuraminic acid synthase (sialic acid synthase) // 4|4 B2	Nans	NM_053179	0.00549605	0.140998	0.865631	-1.15523
BC112410 // Vsig10l // ZV-set and immunoglobulin domain containing 10 like // 7 B4|7 //	Vsig10l	BC112410	0.00556774	0.141139	1.10698	1.10698
NM_001024468 // Bcat1 // branched chain aminotransferase 1, cytosolic // 6 G3|6 73.9 cM	Bcat1	NM_001024468	0.00557106	0.141139	0.833362	-1.19996
NM_001100182 // Cyp2j12-ps // cytochrome P450, family 2, subfamily j, polypeptide 12, p	Cyp2j12-ps	NM_001100182	0.00565087	0.141139	1.52024	1.52024
NM_001145930 // Yeats2 // YEATS domain containing 2 // 16 A3|16 // 208146 /// NM_001033	Yeats2	NM_001145930	0.00559132	0.141139	0.901228	-1.1096
NM_001177602 // Ak4 // adenylate kinase 4 // 4 C6|4 47.6 cM // 11639 /// NM_001177604 /	Ak4	NM_001177602	0.00556315	0.141139	0.628803	-1.59032
NM_009082 // Rpl29 // ribosomal protein L29 // 9|9 F2-F4 // 19944 /// BC081467 // Rpl29	Rpl29	NM_009082	0.00561959	0.141139	1.09515	1.09515
NM_009873 // Cdk6 // cyclin-dependent kinase 6 // 5 A2-A3|5 1.0 cM // 12571 /// ENSMUST	Cdk6	NM_009873	0.00561679	0.141139	1.15165	1.15165
NM_010288 // Gja1 // gap junction protein, alpha 1 // 10 B4|10 29.0 cM // 14609 /// ENS	Gja1	NM_010288	0.00554382	0.141139	0.870704	-1.1485
NM_010655 // Kpna2 // karyopherin (importin) alpha 2 // 11 E1|11 // 16647 /// D55720 //	Kpna2	NM_010655	0.00564137	0.141139	0.866432	-1.15416
NM_018794 // Atp6ap1 // ATPase, H+ transporting, lysosomal accessory protein 1 // X A7.	Atp6ap1	NM_018794	0.00552703	0.141139	0.920485	-1.08638
NM_023871 // Set // SET nuclear oncogene // 2 B|2 // 56086 /// AB044937 // Set // SET n	Set	NM_023871	0.00559424	0.141139	1.11634	1.11634
NM_025590 // Acot11 // acyl-CoA thioesterase 11 // 4 C7|4 // 329910 /// ENSMUST00000102	Acot11	NM_025590	0.00563389	0.141139	0.810607	-1.23364
NM_030251 // Abtb1 // ankyrin repeat and BTB (POZ) domain containing 1 // 6 D1|6 // 802	Abtb1	NM_030251	0.00559217	0.141139	1.19167	1.19167
NM_133797 // 4833439L19Rik // RIKEN cDNA 4833439L19 gene // 13 B1|13 // 97820 /// ENSMU	4833439L19Rik	NM_133797	0.0056313	0.141139	0.925344	-1.08068
NM_134157 // Atp6v1b1 // ATPase, H+ transporting, lysosomal V1 subunit B1 // 6 C3|6 32.	Atp6v1b1	NM_134157	0.00564797	0.141139	1.10644	1.10644
NM_146909 // Olfr51 // olfactory receptor 51 // 11 B1.3|11 // 18351 /// NM_146910 // Ol	Olfr51	NM_146909	0.0056066	0.141139	1.19554	1.19554
NM_148941 // Elovl4 // elongation of very long chain fatty acids (FEN1/Elo2, SUR4/Elo3,	Elovl4	NM_148941	0.00565524	0.141139	0.851774	-1.17402
NM_172508 // Dse // dermatan sulfate epimerase // 10 B1|10 // 212898 /// ENSMUST0000004	Dse	NM_172508	0.00551407	0.141139	0.831321	-1.2029
NM_173786 // Apol9a // apolipoprotein L 9a // 15 E1|15 // 223672 /// NM_001162883 // Ap	Apol9a	NM_173786	0.00561128	0.141139	1.10298	1.10298
NM_001003948 // Pid1 // phosphotyrosine interaction domain containing 1 // 1 C5|1 // 98	Pid1	NM_001003948	0.00570979	0.141588	0.763555	-1.30966
NM_009206 // Slc4a1ap // solute carrier family 4 (anion exchanger), member 1, adaptor p	Slc4a1ap	NM_009206	0.00571948	0.141588	0.912193	-1.09626
NM_026176 // Pdcl // phosducin-like // 2 B|2 // 67466 /// ENSMUST00000009174 // Pdcl //	Pdcl	NM_026176	0.00571439	0.141588	0.879482	-1.13703
NM_030743 // Rnf114 // ring finger protein 114 // 2 H3|2 // 81018 /// ENSMUST0000010921	Rnf114	NM_030743	0.00569543	0.141588	0.89832	-1.11319
NM_144833 // Zfp410 // zinc finger protein 410 // 12 D1|12 39.0 cM // 52708 /// ENSMUST	Zfp410	NM_144833	0.0056993	0.141588	0.819857	-1.21972
NM_153562 // BC023814 // cDNA sequence BC023814 // 3 F1|3 // 229503 /// ENSMUST00000005	BC023814	NM_153562	0.00569905	0.141588	0.883713	-1.13159
NM_008937 // Prox1 // prospero-related homeobox 1 // 1 H6|1 106.3 cM // 19130 /// ENSMU	Prox1	NM_008937	0.00579894	0.141677	1.38592	1.38592
NM_009657 // Aldoc // aldolase C, fructose-bisphosphate // 11 B5|11 44.98 cM // 11676 /	Aldoc	NM_009657	0.0058079	0.141677	0.91148	-1.09712
NM_016977 // Mc4r // melanocortin 4 receptor // 18 E1|18 // 17202 /// ENSMUST0000005794	Mc4r	NM_016977	0.00577353	0.141677	0.655851	-1.52474
NM_026346 // Fbxo32 // F-box protein 32 // 15|15 D2 // 67731 /// ENSMUST00000022986 //	Fbxo32	NM_026346	0.00575863	0.141677	1.3745	1.3745
NM_133857 // Usp53 // ubiquitin specific peptidase 53 // 3|3 G3 // 99526 /// ENSMUST000	Usp53	NM_133857	0.00573494	0.141677	0.860074	-1.16269
NM_133927 // Itfg2 // integrin alpha FG-GAP repeat containing 2 // 6 F3|6 // 101142 ///	Itfg2	NM_133927	0.00579508	0.141677	0.84433	-1.18437
NM_145922 // Kcnc4 // potassium voltage gated channel, Shaw-related subfamily, member 4	Kcnc4	NM_145922	0.00580366	0.141677	0.650188	-1.53802
NM_172743 // Plekha7 // pleckstrin homology domain containing, family A member 7 // 7 F	Plekha7	NM_172743	0.00579938	0.141677	0.810493	-1.23382
NM_178668 // Pde12 // phosphodiesterase 12 // 14 A3|14 // 211948 /// ENSMUST00000052932	Pde12	NM_178668	0.00579444	0.141677	1.14599	1.14599
NM_181540 // Tm6sf2 // transmembrane 6 superfamily member 2 // 8 B3.3|8 // 107770 /// E	Tm6sf2	NM_181540	0.00576454	0.141677	0.723857	-1.38149
NM_001025384 // DXBay18 // DNA segment, Chr X, Baylor 18 // X A7.3|X // 574405 /// NM_0	DXBay18	NM_001025384	0.00582241	0.141843	1.15433	1.15433
NM_020289 // Olfr544 // olfactory receptor 544 // 7 E3|7 // 257926 /// ENSMUST000000512	Olfr544	NM_020289	0.00583665	0.142001	1.15298	1.15298
NM_008503 // Rps2 // ribosomal protein S2 // 17 A3.3|17 // 16898 /// BC087956 // Rps2 /	Rps2	NM_008503	0.00586289	0.142075	1.12664	1.12664
NM_009450 // Tubb2a // tubulin, beta 2A // 13 A3.3|13 16.0 cM // 22151 /// ENSMUST00000	Tubb2a	NM_009450	0.00585211	0.142075	0.708432	-1.41157
NM_053204 // Erc1 // ELKS/RAB6-interacting/CAST family member 1 // 6 F1|6 // 111173 ///	Erc1	NM_053204	0.00586102	0.142075	0.82466	-1.21262
NM_028021 // Myh14 // myosin, heavy polypeptide 14 // 7|7 B2 // 71960 /// ENSMUST000001	Myh14	NM_028021	0.00588965	0.142535	1.14426	1.14426
NM_019643 // Fam60a // family with sequence similarity 60, member A // 6 G3|6 // 56306	Fam60a	NM_019643	0.00590526	0.142725	1.38843	1.38843
NM_012043 // Islr // immunoglobulin superfamily containing leucine-rich repeat // 9 B|9	Islr	NM_012043	0.00592719	0.143067	0.546586	-1.82954
NM_001163513 // Dlg5 // discs, large homolog 5 (Drosophila) // 14 A3|14 // 71228 /// NM	Dlg5	NM_001163513	0.00597989	0.143128	0.864403	-1.15687
NM_009033 // Rbmxrt // RNA binding motif protein, X chromosome retrogene // 8 C1|8 // 1	Rbmxrt	NM_009033	0.0059978	0.143128	0.899626	-1.11157
NM_009908 // Cmas // cytidine monophospho-N-acetylneuraminic acid synthetase // 6 G3|6	Cmas	NM_009908	0.00596421	0.143128	0.852936	-1.17242
NM_013561 // Htr3a // 5-hydroxytryptamine (serotonin) receptor 3A // 9 A5.3|9 // 15561	Htr3a	NM_013561	0.00598638	0.143128	0.803355	-1.24478
NM_015759 // Fgd3 // FYVE, RhoGEF and PH domain containing 3 // 13 A5|13 31.0 cM // 309	Fgd3	NM_015759	0.00597811	0.143128	1.11766	1.11766
NM_021338 // Rpl35a // ribosomal protein L35A // 16 B3|16 // 57808 /// NM_001130484 //	Rpl35a	NM_021338	0.00599657	0.143128	1.15961	1.15961
NM_027469 // Gfod2 // glucose-fructose oxidoreductase domain containing 2 // 8|8 D2 //	Gfod2	NM_027469	0.00595886	0.143128	0.893653	-1.119
NM_133957 // Nfat5 // nuclear factor of activated T-cells 5 // 8 D2|8 53.0 cM // 54446	Nfat5	NM_133957	0.00596926	0.143128	1.0996	1.0996
NM_199467 // F730047E07Rik // RIKEN cDNA F730047E07 gene // 4 A3|4 // 212377 /// ENSMUS	F730047E07Rik	NM_199467	0.00599982	0.143128	1.12457	1.12457
ENSMUST00000082239 // Gm10050 // predicted gene 10050 // --- // 791333	Gm10050	ENSMUST00000082239	0.00603354	0.143208	1.13025	1.13025
NM_009325 // Tbxa2r // thromboxane A2 receptor // 10 C1|10 43.0 cM // 21390 /// ENSMUST	Tbxa2r	NM_009325	0.00601907	0.143208	1.14297	1.14297
NM_025670 // 5730403B10Rik // RIKEN cDNA 5730403B10 gene // 16 A1|16 2.7 cM // 66626 //	5730403B10Rik	NM_025670	0.00604219	0.143208	0.918369	-1.08889
NM_138303 // Yipf2 // Yip1 domain family, member 2 // 9 A3|9 // 74766 /// NM_021531 //	Yipf2	NM_138303	0.00603859	0.143208	0.814857	-1.22721
NM_173763 // Ccbl2 // cysteine conjugate-beta lyase 2 // 3 H1|3 // 229905 /// ENSMUST00	Ccbl2	NM_173763	0.00604195	0.143208	1.26073	1.26073
DQ656357 // A230006K03Rik // RIKEN cDNA A230006K03 gene // 7 C|7 // 27493 /// ENSMUST00	A230006K03Rik	DQ656357	0.00611231	0.143719	1.18135	1.18135
ENSMUST00000100423 // Apobec3 // apolipoprotein B mRNA editing enzyme, catalytic polype	Apobec3	ENSMUST00000100423	0.00612102	0.143719	1.15799	1.15799
ENSMUST00000101255 // 9230009I02Rik // RIKEN cDNA 9230009I02 gene // 11 B1.3|11 // 6192	9230009I02Rik	ENSMUST00000101255	0.00612397	0.143719	1.26938	1.26938
NM_010272 // Gdf11 // growth differentiation factor 11 // 10 D3|10 // 14561 /// ENSMUST	Gdf11	NM_010272	0.00610534	0.143719	0.839552	-1.19111
NM_021448 // Elp2 // elongation protein 2 homolog (S. cerevisiae) // 18 A2|18 // 58523	Elp2	NM_021448	0.00611636	0.143719	0.896464	-1.11549
NM_026385 // Pllp // plasma membrane proteolipid // 8 C5|8 // 67801 /// ENSMUST00000034	Pllp	NM_026385	0.00609394	0.143719	1.34105	1.34105
NR_028543 // Snord47 // small nucleolar RNA, C/D box 47 // 1|1 // 100217446	Snord47	NR_028543	0.00612631	0.143719	1.1937	1.1937
NM_013658 // Sema4a // sema domain, immunoglobulin domain (Ig), transmembrane domain (T	Sema4a	NM_013658	0.0061388	0.143828	0.736119	-1.35848
NM_021442 // Mecom // MDS1 and EVI1 complex locus // 3 A3|3 14.4 cM // 14013	Mecom	NM_021442	0.00617174	0.144415	1.13876	1.13876
NM_016891 // Ppp2r1a // protein phosphatase 2 (formerly 2A), regulatory subunit A (PR 6	Ppp2r1a	NM_016891	0.00619195	0.144704	0.9436	-1.05977
NM_009196 // Slc16a1 // solute carrier family 16 (monocarboxylic acid transporters), me	Slc16a1	NM_009196	0.00622261	0.144873	1.21579	1.21579
NM_133752 // Opa1 // optic atrophy 1 homolog (human) // 16 B2|16 21.5 cM // 74143 /// E	Opa1	NM_133752	0.00622264	0.144873	1.09959	1.09959
NM_177346 // Gpr149 // G protein-coupled receptor 149 // 3 E1|3 // 229357 /// ENSMUST00	Gpr149	NM_177346	0.00622876	0.144873	0.646597	-1.54656
NM_183322 // Khdc1a // KH domain containing 1A // 1 A4|1 // 368204 /// ENSMUST000000884	Khdc1a	NM_183322	0.00623071	0.144873	1.15975	1.15975
NM_008831 // Phb // prohibitin // 11 D|11 55.6 cM // 18673 /// ENSMUST00000125172 // Ph	Phb	NM_008831	0.00624145	0.144939	0.878627	-1.13814
NM_029364 // Gns // glucosamine (N-acetyl)-6-sulfatase // 10 D2|10 // 75612 /// ENSMUST	Gns	NM_029364	0.0062624	0.145242	0.864312	-1.15699
NM_011401 // Slc2a3 // solute carrier family 2 (facilitated glucose transporter), membe	Slc2a3	NM_011401	0.00627768	0.145412	0.867057	-1.15333

## Sheet: hLRRK2-WT vs. non-Tg
Gene_assignment	Gene Symbol	RefSeq	p-value	q value	Ratio (hLRRK2-WT vs. non-Tg)	Fold-Change (hLRRK2-WT vs. non-Tg)
NM_198652 // Hjurp // Holliday junction recognition protein // 1 D|1 // 381280 /// BC05	Hjurp	NM_198652	1.28896e-12	4.58301e-08	2.21131	2.21131
NM_001163614 // Ascl4 // achaete-scute complex homolog 4 (Drosophila) // 10 C1|10 // 67	Ascl4	NM_001163614	5.78581e-06	0.0685734	1.09943	1.09943

## Sheet: hLRRK2-R1441G vs. non-Tg
Gene_assignment	Gene Symbol	RefSeq	p-value	q value	Ratio (hLRRK2-WT vs. non-Tg)	Fold-Change (hLRRK2-R1441G vs. non-Tg)
None	-	-	-	-	-	-

## Sheet: hLRRK2-R1441G vs. hLRRK2-WT
Gene_assignment	Gene Symbol	RefSeq	p-value	q value	Ratio (hLRRK2-R1441G vs. hLRRK2-WT)	Fold-Change (hLRRK2-R1441G vs. hLRRK2-WT)
NM_198652 // Hjurp // Holliday junction recognition protein // 1 D|1 // 381280 /// BC05	Hjurp	NM_198652	1.45441e-12	3.67296e-08	0.454657	-2.19946
